# An automated, high-throughput image analysis pipeline enables genetic studies of shoot and root morphology in carrot (*Daucus carota* L.)

1 Sarah D. Turner<sup>1</sup>, Shelby L. Ellison<sup>2</sup>, Douglas A. Senalik<sup>2</sup>, Philipp W. Simon<sup>1,2</sup>, Edgar P.  
2 Spalding<sup>3\*</sup>, Nathan D. Miller<sup>3</sup>

3 <sup>1</sup>Department of Horticulture, University of Wisconsin-Madison, United States

4 <sup>2</sup>USDA-ARS Vegetable Crops Research Unit, Madison, WI, United States

5 <sup>3</sup>Department of Botany, University of Wisconsin-Madison, United States

6 \* **Correspondence:**

7 Edgar P. Spalding

8 spalding@wisc.edu

9 **Keywords:** carrot, plant breeding, shoot architecture, storage root shape, image-based phenotyping

10 **Words:** 7370

11 **Figures and tables:** 11

12 **Abstract**

13 Carrot is a globally important crop, yet efficient and accurate methods for quantifying its most  
14 important agronomic traits are lacking. To address this problem, we developed an automated analysis  
15 platform that extracts components of size and shape for carrot shoots and roots, which are necessary  
16 to advance carrot breeding and genetics. This method reliably measured variation in shoot size and  
17 shape, leaf number, petiole length, and petiole width as evidenced by high correlations with hundreds  
18 of manual measurements. Similarly, root length and biomass were accurately measured from the  
19 images. This platform quantified shoot and root shapes in terms of principal components, which do  
20 not have traditional, manually-measurable equivalents. We applied the pipeline in a study of a six-  
21 parent diallel population and an F<sub>2</sub> mapping population consisting of 316 individuals. We found high  
22 levels of repeatability within a growing environment, with low to moderate repeatability across  
23 environments. We also observed co-localization of quantitative trait loci for shoot and root  
24 characteristics on chromosomes 1, 2, and 7, suggesting these traits are controlled by genetic linkage  
25 and/or pleiotropy. By increasing the number of individuals and phenotypes that can be reliably  
26 quantified, the development of a high-throughput image analysis pipeline to measure carrot shoot and  
27 root morphology will expand the scope and scale of breeding and genetic studies.

## 28 **1 Introduction**

29 Carrot is a globally important crop that originated in Central Asia (Iorizzo et al., 2013; Vavilov,  
30 1992) with a secondary center of diversity in Asia Minor (Banga, 1957). A hallmark of carrot  
31 domestication is the capacity to develop a thickened storage root (Macko-Podgórní et al., 2017).  
32 Selective breeding has since improved taproot size, shape, and uniformity, resulting in forms that  
33 have served as the primary delimiter of variety classification since the 1600s (Simon et al., 2008). By  
34 comparison, carrot shoots have received much less attention despite the practical limitation of poor  
35 weed competitive ability during the seedling stage, with successful crop establishment often  
36 requiring intensive herbicide application and hand weeding (Bell et al., 2000; Bellinder et al., 1997;  
37 Colquhoun et al., 2017; Swanton et al., 2010), or the fact that the petioles must be sufficiently strong  
38 for the root to be mechanically harvested (Rogers and Stevenson, 2006). Currently, a primary  
39 breeding objective is to achieve rapidly growing, sturdy shoots without compromising the size and  
40 shape of the storage root. Therefore, methods to measure both shoots and roots more objectively are  
41 required (Horgan, 2001). These methods should be quantitative and objective, replacing traditional  
42 subjective descriptors such as circular, obovate, obtriangular, and narrow oblong to describe the root  
43 profile, or blunt, slightly pointed, and strongly pointed to describe the distal end (or tip) of the storage  
44 root. Similarly, methods should characterize shoot architecture more comprehensively than typical  
45 measurements of plant height, width, and biomass.

46 Image analysis has proven useful in describing several crop shoot systems while growing in  
47 controlled environments, during the field season, and after harvest (Fahlgren et al., 2015; Furbank  
48 and Tester, 2011; Lobet et al., 2013). Notably, a similar approach to characterizing carrot shoots must  
49 accommodate some special issues. In contrast to many crops, carrots do not produce a shoot structure  
50 by erecting a typical stem axis with leaves. Instead, an apical meristem at or beneath the soil  
51 produces leaves attached by petioles to internodes that do not elongate during the vegetative phase of  
52 the crop cycle. The petiole of each leaf, not the internode, elongates at an angle to lift and spread the  
53 leaf blade. Thus, the cluster of petioles attached to the crown of the root is a major architectural  
54 feature of the shoot structure that a phenotyping method must capture.

55 In addition to attributes of individual plant parts, allocation of resources between the shoot and root  
56 of plants plays a central role in crop fitness and improvement (Lynch, 2007; Poorter et al., 2012).  
57 Thus, a phenotyping platform for a root crop such as carrot should measure both shoot and root traits.  
58 For instance, what may appear to be a practically helpful change in shoot architecture could  
59 negatively impact light interception and therefore photosynthesis (Falster and Westoby, 2003), while  
60 altered root structure could influence fibrous root architecture, which plays a critical role in water and  
61 nutrient acquisition (Lynch, 1995; York et al., 2013). The evidence of pleiotropic relationships  
62 between root and shoot phenotypes in *Arabidopsis* (Bouteillé et al., 2012), maize (Dignat et al., 2013;  
63 Ruta et al., 2010), barley (Naz et al., 2014), soybean (Manavalan et al., 2015), rice (Li et al., 2009),  
64 and lentil (Idrissi et al., 2016) is yet another motivation to build a comprehensive root and shoot  
65 phenotyping platform for carrot.

66 Any improved methods for measuring shoot and root phenotypes in carrot would be useful in studies  
67 designed to identify genetic loci that control these traits. To date, the majority of genetic studies in  
68 carrot have focused on storage root pigmentation, specifically anthocyanin content (Cavagnaro et al.,  
69 2014; Yildiz et al., 2013) and carotenoid accumulation (Bradeen and Simon, 1998; Buishand and  
70 Gabelman, 1979; Ellison et al., 2017; Iorizzo et al., 2016; Just et al., 2007, 2009). More recently, two  
71 potential domestication loci that influence carrot morphology were identified on chromosome 2 for  
72 early flowering (*Vrn1*; Alessandro et al., 2013) and storage root development (*DcAHLc1*, Macko-

## Automated image analysis for genetic studies of carrot shoot and root shape

73 Podgórní et al., 2014, 2017). Additionally, the observation of a linear relationship between the  
74 logarithms of shoot biomass and storage root biomass in carrot (Hole et al., 1983; Turner et al., 2018)  
75 suggests potential genetic relationships, but the causal genetic loci, the extent of polygenic control,  
76 and the influence of pleiotropy on shoot and root architecture in carrot have not yet been investigated.

77 For the reasons outlined above, carrot breeders are interested to measure carrot root and shoot  
78 morphologies, preferably more objectively (Horgan, 2001). More precise and objective data on the  
79 traits of interest will increase the ability to leverage genomic data and the potential for genetic gain in  
80 breeding projects. Current limitations include the inability to measure some traits of interest and the  
81 labor cost to collect hand measurements. These bottlenecks can be addressed using high-throughput  
82 image analysis (Fahlgren et al., 2015; Furbank and Tester, 2011). Moreover, increasing precision and  
83 sample size through automated image analysis will support practical breeding efforts by decreasing  
84 experimental error, thereby improving estimates of heritability, facilitating the detection of causative  
85 genetic loci, and expanding our understanding of quantitative inheritance (Kuijken et al., 2015).

86 Here we describe a relatively simple and low cost method to acquire 2D images of whole, excavated  
87 carrot plants. This is coupled with a set of custom computer algorithms that quantify shoot  
88 architectural features as well as the size and shape of storage roots. The entire pipeline is shown to  
89 detect meaningful variation for traits of interest in two commonly used experimental populations of  
90 carrot: a six-parent diallel mating design (Turner et al., 2018) and an  $F_2$  mapping population  
91 exhibiting segregation for root shape and shoot architecture. To further demonstrate the utility of this  
92 phenotyping method for genetic studies in carrot, we also applied multiple quantitative trait loci  
93 (QTL) mapping (MQM) to hand and image measured data from the  $F_2$  population. This pipeline,  
94 coupled with the availability of a carrot genome (Iorizzo et al., 2016) and the accessibility of high-  
95 throughput genotyping resources, will enable further insight into the underlying genetics of complex  
96 shoot and root traits in carrot.

## 97 **2 Materials and Methods**

### 98 **2.1 Plant Materials and Experimental Design**

99 Samples included individual plants from two sources: a diallel mating design with six diverse inbred  
100 parents and an  $F_2$  population that segregates for plant height, shoot biomass, and storage root shape.  
101 Seeds were sown on 1.5 meter (m) plots with 1 m spacing between rows. Carrots were harvested and  
102 stored at 1-2°C prior to imaging. Field sites included the University of California Desert Research  
103 and Extension Center (Holtville, CA, USA) and the University of Wisconsin Hancock Agricultural  
104 Research Station (Hancock, WI, USA). **Figure S1** diagrams the sample size and sources of  
105 individuals used for imaging and QTL mapping, which are described briefly below.

106 Diallel progenies were grown in a randomized complete block design (RCBD) with two replicates in  
107 WI (2015) and CA (2016) (see Turner et al. 2018 for additional details). The  $F_2$  population, L8708 x  
108 Z020, was identified from prior field screening as segregating for plant height, shoot biomass, and  
109 root storage shape and color. This population was derived from a cross between L8708, an orange  
110 inbred line with a medium-long storage root and compact shoots, and Z020, a yellow, cultivated  
111 landrace from Uzbekistan with a short, blunt-tipped storage root and broad, prostrate leaves. A single  
112  $F_1$  plant was selected from this cross and selfed to produce the  $F_2$  population used for mapping in this  
113 study.  $F_2$  plants were grown at the CA location in 2013 ( $n = 63$ ) and 2016 ( $n = 450$ ) and at the WI  
114 location in 2016 ( $n = 77$ ). Additional  $F_2$  plants of the same cross, but derived from a different  $F_1$

## Automated image analysis for genetic studies of carrot shoot and root shape

115 plant, were also grown at CA in 2016 (n=128) and were used only for validation of image  
116 measurements.

### 117 **2.2 Manual Measurements**

118 A total of 1041 carrot plants were measured manually and photographed for the dual purpose of  
119 developing an automated phenotyping method and determining the genetic architecture of important  
120 traits. Hand measurements were recorded for shoot height (cm), root length (cm), leaf number, shoot  
121 biomass (g), and root biomass (g). Unless otherwise specified, the term 'root' will refer to the storage  
122 root in this report. Shoot height, measured as the distance from the crown to the tip of the longest  
123 leaf, was recorded in the field for three plants per plot of each diallel entry and after harvest for each  
124 F<sub>2</sub> individual. Root length was measured as the distance from the crown to the tip of the storage root,  
125 defined here as having a diameter greater than 2 mm. Leaf number was recorded as the total number  
126 of fully expanded, true leaves. Shoot biomass was sampled by removing all shoot tissue more than 4  
127 cm above the crown. For root biomass, fresh weight was recorded for the entire root and for a  
128 subsample, which was dried and extrapolated to estimate dry weight for the entire root. Fresh weights  
129 were recorded immediately for both shoot and root tissues. For dry shoot and root weights, samples  
130 were dried at 60°C in a forced-draft oven and values were recorded after reaching constant mass.  
131 Ground truth data for digital measurements of petiole length and diameter was recorded for a subset  
132 of 100 images using ImageJ (Schneider et al., 2012).

### 133 **2.3 Image Acquisition and Preprocessing**

134 Digital images were collected in tandem with hand measurements. The imaging set-up consisted of a  
135 2.5 cm PVC frame (145 cm long x 100 cm wide x 136 cm tall) with a white, non-reflective baseboard  
136 and a Nikon D3300 DSLR camera mounted on a centered, overhead boom. The baseboard was  
137 divided into upper and lower halves by a black, horizontal line with a gap in the center where a carrot  
138 was positioned such that its shoot lay above the line and the root below it (**Figure 1A, left**). A  
139 computer running custom gphoto2 scripts controlled the camera (Gage et al., 2017). All images were  
140 acquired in ambient light with an 18-55 mm lens set to 18 mm and positioned 85 cm above the  
141 baseboard. Carrot leaves were deliberately arranged to maximize the distance between individual  
142 leaves.

143 Input files were raw Nikon Electronic File (NEF) images (dimensions 6000 x 4000 pixels) with  
144 uniform positioning of the carrot crown on the focal plane. As part of the computational workflow,  
145 raw NEF files were automatically converted to Tagged Image Format (TIF) files with a resolution of  
146 129 dots per inch. These files served as the inputs for custom trait extraction algorithms written in the  
147 MATLAB 9.0 language (The MathWorks Inc., 2016). To separate the carrot plant from the  
148 background, the red-green-blue (RGB) images were converted to grayscale and to the hue-saturation-  
149 value (HSV) representation of color. The S channel was subtracted from the grayscale image and the  
150 Otsu threshold method was applied to produce a binary image (MASK) in which pixels belonging to  
151 the carrot object were white (1) and background pixels were black (0). Based on the location of the  
152 horizontal black line on the baseboard, images were split into shoot and root sections for  
153 corresponding morphometric analyses.

### 154 **2.4 Computational Workflow**

155 As described by Miller et al. (2017), a high-throughput computational workflow was implemented  
156 using a community cyberinfrastructure, which is publicly available as a software tool through the  
157 CyVerse Discovery Environment web interface (**Figure 1**). Briefly, image files were uploaded to the

## Automated image analysis for genetic studies of carrot shoot and root shape

158 integrated rule-oriented data store system (iRODS) (Rajasekar et al., 2010) managed by CyVerse  
159 (Merchant et al., 2016) (**Figure 1**). Each image was processed as a separate computational job using  
160 parallel computing enabled by the University of Wisconsin's Center for High-Throughput  
161 Computing. Scheduling, resource matching, execution of analyses, and return of results was managed  
162 by the HTCondor software (Thain et al., 2005). Results were then returned to the data store holding  
163 the original images (**Figure 1A**).

### 164 **2.5 Image Analysis**

165 All images were processed through a two-stage workflow (**Figure 1B**) and data was returned as both  
166 individual CSV files for each measurement and as an indexable JavaScript Object Notation (JSON)  
167 file containing all measurements. For the shoot, root, and whole carrot masks, data output included  
168 classic image measurements of a bounding box (used to measure shoot height, root length, and root  
169 width), convex hull, eccentricity, equivalent diameter, Euler number, perimeter, and solidity.  
170 Measurements of interest included shoot and root biomass profiles, petiole width, petiole number,  
171 and petiole length, which are described in detail below. File names, measurements, and data structure  
172 are described in **Table S1**.

#### 173 **2.5.1 Distribution of Shoot Biomass**

174 Morphological features of the shoot were quantified from the portion of the binarized image that lay  
175 above the horizontal line marking the root-shoot junction. Each pixel in the plant mask has a value of  
176 1 (white) and each pixel outside of the mask is black (value of 0). The diagram in **Figure 2A**  
177 demonstrates how an elliptical grid originating at the crown was used to create a shoot biomass  
178 profile (SBP). A running sum of each pixel value (integral) along each sweep ( $\theta = -\pi$  to  $\pi$ ) of the grid  
179 determined the amount of digital biomass (or shoot area) at each radius. The entire distribution of  
180 digital biomass (white pixels) is given by:

$$181 \quad SBP(r) = \int_{-\pi}^{\pi} MASK(r, \theta) d\theta$$

182 At the lowest values of  $r$ , the SBP primarily reflects petiole material. The contribution of leaf blade  
183 material increases as  $r$  increases, then decreases at  $r$  values that exceed the plant mask, as shown in  
184 **Figure 2A**. The result was stored as an  $n$ -dimensional vector, where  $n$  is the number of points along  
185 the radius, i.e. the number of sweeps used to build the distribution. The default value of  $n$  is 1000. To  
186 document the fidelity of each analysis, the algorithm also generates an image of the binarized carrot  
187 shoot with overlays of the half elliptical grid and computed biomass profile. The SBP determined in  
188 this way formed the basis for subsequent shoot trait extraction methods.

#### 189 **2.5.2 Petiole Characteristics**

190 To estimate petiole width, a Euclidean distance transformation (EDT) was applied over the entire  
191 binary shoot image. The EDT labels each pixel in the plant mask with a value equal to the distance to  
192 the nearest contour pixel. Next, the image was skeletonized. The EDT value at each skeleton point  
193 was sampled to produce a distribution of values corresponding to each pixel in the mask. This  
194 distribution was used as the input for the prediction step using partial least squares (PLS) regression  
195 (Wold, 1982; Wold et al., 1984) against the ground truth values from ImageJ. The number of  
196 components to retain in the PLS model was assessed using cross-validation with a one-fold holdout.

197 To predict the number of petioles in an image, the digital shoot biomass (i.e. the sum of white pixels  
198 in the binary shoot image) was divided by the algorithm-measured petiole width. This was performed

## Automated image analysis for genetic studies of carrot shoot and root shape

199 for every image of a shoot. The resulting ratio of total mass divided by average petiole width value  
200 was the input for PLS regression against the true counts, which were collected by hand at the time the  
201 image was acquired. The number of components to retain in the PLS model was assessed using  
202 cross-validation with a one-fold holdout.

203 To predict petiole length, the SBP was subjected to principal components analysis. The principal  
204 components extracted from the SBP and the ground truth values for petiole length, which were  
205 collected from 100 images in ImageJ, were used to train a two-layer feed forward neural network  
206 (Bhandarkar et al., 1996). The prediction step was also performed with PLS regression as was done  
207 for the petiole number. In this case, the neural network method provided higher correlations than PLS  
208 regression. Vectors for petiole counts, width, and length were returned to the data store for  
209 subsequent analyses.

### 210 2.5.3 Root Shape

211 A root biomass profile was generated by recording the number of white pixels along each horizontal  
212 sweep, which was returned as a 1000-dimensional vector (**Figure 2B**). To focus exclusively on shape  
213 differences, the root biomass profile was normalized by both length and width prior to principal  
214 components analysis, which was used to examine symmetrical shape variance. The binarized root  
215 image with the root outline in green was also returned to the data store for error checking.

### 216 2.6 Correlations and Repeatability

217 All downstream analyses were performed in R 3.3.2 (R Core Team, 2016). Pearson's correlation  
218 coefficients ( $r$ ) and Spearman's rho ( $\rho$ ) were used to compare manual- and image-measured traits.  
219 For manual-measured and digital biomass, correlations were estimated using a linear log-log  
220 relationship, following established guidelines for allometric models of biomass partitioning in carrot  
221 (Hole et al., 1983) and in seed plants (Enquist and Niklas, 2002). When possible, algorithm-measured  
222 values were converted from pixels to centimeters using reference points of known size on the  
223 baseboard.

224 Repeatability, which describes the proportion of trait variance attributable to differences among  
225 rather than within individuals, was calculated using observations for 336 individual plants  
226 representing 42 crosses from a six-parent diallel mating design. Variance components were assessed  
227 using the linear mixed-effects model  $y_{ijk} = \mu + G_i + E_j + B_{k(j)} + GE_{ij} + R_{ijk}$ , where  $y_{ijk}$  is the  
228 phenotype,  $G_i$  is the effect of genotype,  $E_j$  is the effect of environment,  $B_{k(j)}$  is the effect of  
229 replication  $k$  within environment  $j$ ,  $GE_{ij}$  is the interaction between genotype  $i$  and environment  $j$ , and

230  $R_{ijk}$  is the residual error. Repeatability was estimated on an entry-mean basis as  $\frac{\sigma_G^2}{(\sigma_G^2 + \sigma_{GxE}^2/t + \sigma_R^2/rt)}$ ,

231 where  $t$  is the harmonic mean of test environments and  $r$  is the harmonic mean number of replications  
232 in each environment. Similarly, repeatability was calculated for each individual environment as

233  $\frac{\sigma_G^2}{(\sigma_G^2 + \sigma_R^2/r)}$ .

### 234 2.7 DNA Extraction and Quantification

235 Following image capture, a 1.5 g leaf sample (fresh weight) was collected from each F<sub>2</sub> plant. Total  
236 genomic DNA was isolated from ~20 mg of lyophilized leaf tissue using the CTAB method of  
237 Murray and Thompson (1980) with modifications by Boiteux et al. (1999). DNA quality was  
238 assessed visually using 1% agarose gel electrophoresis and double-stranded DNA was quantified

## Automated image analysis for genetic studies of carrot shoot and root shape

239 using the Quant-iT™ PicoGreen® dsDNA assay kit (Life Technologies, Grand Island, NY, USA).  
240 Concentrations were normalized to 10 ng/μl.

### 241 2.8 Genotyping-by-Sequencing (GBS)

242 GBS was conducted following the protocol of Elshire et al. (2011) and as described for carrot  
243 (Arbizu et al., 2016; Ellison et al., 2017; Iorizzo et al., 2016). Library construction and sequencing  
244 were performed by the University of Wisconsin-Madison Biotechnology Center (WI, USA) using  
245 half-sized reactions. Genomic DNA was digested with *ApeKI*, barcoded, and pooled for sequencing  
246 with 85-95 pooled samples per Illumina HiSeq 2000 lane. Samples were sequenced using single end,  
247 100 nt reads and v3 SBS reagents (Illumina, San Diego, CA, USA).

248 SNPs were called using the TASSEL-GBS pipeline version 5.2.31 (Bradbury et al., 2007; Glaubitz et  
249 al., 2014). Filtering was conducted in VCFtools version 0.1.14 (Danecek et al., 2011) with the  
250 following parameters: a minimum minor allele frequency of 0.1 and maximum missing data of 10%  
251 for both genotype and marker.

### 252 2.9 Genetic Map Construction

253 Linkage maps were constructed using the JoinMap 4.1 software (Van Ooijen, 2011). Markers and  
254 genotypes which deviated from expected segregation ratios based on a Chi-square test ( $P < 0.001$ )  
255 were excluded. All linkage groups were obtained at a LOD threshold greater than 10. The regression  
256 mapping algorithm was used with Kosambi's mapping function to calculate the distance between  
257 markers (Kosambi, 1943). Linkage groups were achieved by aligning GBS sequences to the carrot  
258 genome (Iorizzo et al., 2016) and corresponded to nine chromosomes. After initial mapping, markers  
259 defined as having insufficient linkage were flipped to the opposite phase and remapped. Two rounds  
260 of the regression mapping algorithm were used to increase the number of loci incorporated into the  
261 map.

### 262 2.10 QTL Mapping

263 QTL analysis was conducted in R 3.3.2 (R Core Team, 2016) using the R/qtl package (Broman and  
264 Sen, 2009). Individuals included 316 F<sub>2</sub> plants from the CA2016 environment. Genotype  
265 probabilities were calculated using a step value of one for the entire linkage map and an assumed  
266 genotyping error rate of 0.001. Missing genotype data was replaced with the most probable values  
267 using the Viterbi algorithm (method = 'argmax') in the 'fill.geno' function.

268 Multiple QTL mapping (MQM) (Jansen and Stam, 1994) was performed in R/qtl using the  
269 'mqmscan' function with an additive model and cofactor significance set to 0.001 (Arends et al.,  
270 2010). Cofactors were set at a fixed marker interval of 5 cM. Following scripts developed by Moore  
271 et al. (2013), genome-wide LOD significance thresholds were determined for each phenotype using  
272 parallel computing on the Open Science Grid (OSG) (Sfiligoi et al., 2009; Pordes et al., 2007).  
273 Significance thresholds were based on 10,000 random permutations (Churchill and Doerge, 1994)  
274 with the assumed genotyping error rate set to 0.001 and  $\alpha = 0.01$ . For each QTL, confidence intervals  
275 were determined using the 1.5 LOD drop off flanking the most significant peak of the QTL. Linkage  
276 maps and QTL intervals were plotted in Mapchart 2.1 (Voorrips, 2002). Percent variance explained  
277 (PVE) was calculated using the formula  $PVE = 1 - 10^{-\frac{2}{n}LOD}$ , where  $n$  is the number of individuals  
278 (Broman and Sen, 2009). QTL were named using an abbreviation for the trait (e.g. *ht*, height)  
279 suffixed with the chromosome (1-9), and finally the serial number of QTLs on the chromosome (e.g.  
280 *ht-2.1*, *ht-2.2*).

## 281 3 Results

### 282 3.1 Image analysis

283 For the 1041 images submitted through the analysis pipeline, 917 (88%) ran successfully and  
284 returned data. Of the 124 images that failed, two were also missing hand measurements, eight had  
285 root defects such as sprangle (i.e. branching of the root), 60 had poor lighting or shadowing, eight  
286 overlapped with the edge of the image or the black line separating the shoot and root, and 46 failed  
287 for reasons which were not readily identifiable, with possible explanations including the presence of  
288 numerous fibrous roots, interference of labels, and/or diminutive plant size.

### 289 3.2 Correlations between hand and algorithm measurements

290 Overall, traits extracted automatically from images had strong and significant ( $P < 0.001$ ) correlations  
291 with their manually measured analogs, ranging from  $r = 0.77$  for leaf number to  $r = 0.93$  for root  
292 biomass. Relationships among manual- and image-measured values for shoot height, shoot biomass,  
293 root length, and root biomass are detailed in **Figure 3**. Shoot height and root length each had  
294 correlations of  $r = 0.88$  between manual and image measurements, with larger correlations observed  
295 for shoot biomass and shoot area ( $r = 0.91$ ) and between root biomass and root area ( $r = 0.93$ ).  
296 Notably, correlations ranged from low to moderate when comparing shoot to root attributes, such as  
297 shoot height and root length ( $r = 0.18$ ), and the correlation between shoot and root biomass deviated  
298 from unity for both manual measurements ( $r = 0.72$ ) and for algorithm values ( $r = 0.62$ ).

299 Similarly, **Figure 4** presents the strong correlations between manual measurements and algorithm  
300 predictions for petiole attributes, with manual measurements of petiole length and width based on  
301 ground truth data from images. The highest correlation was observed for petiole length ( $n=100$ ,  
302  $r=0.90$ ,  $\rho=0.91$ ), followed by petiole width ( $n=100$ ,  $r=0.85$ ,  $\rho=0.86$ ), and leaf number ( $n=910$ ,  
303  $r=0.77$ ,  $\rho=0.84$ ). For leaf number, accuracy was noticeably reduced above 15 leaves, at which point  
304 it becomes difficult to resolve individual petioles in a 2D space. Similarly, estimates may also be  
305 skewed for plants with dense, compact shoots. Correlations among all phenotypes, including  
306 additional measurements, are provided in **Figure S2**.

### 307 3.3 Principal components analysis of shoot biomass and root shape

308 For shoot biomass profiles, principal components analysis identified differences in the magnitude and  
309 location of biomass (**Figure 5**). The first two principal components accounted for 80.3 percent of the  
310 variation explained (PVE). Sweeping PC1 detected differences in overall biomass accumulation  
311 (43.7 PVE), which is likely a combination of increases in both leaf number and total leaf area.  
312 Sweeping PC2 corresponded to decreasing petiole length and overall height (36.6 PVE), capturing  
313 variation for shoot compactness.

314 To identify symmetrical differences in root shape, root biomass profiles were rescaled to constant  
315 length and width prior to principal components analysis. Principal components detected differences  
316 in the contour of the roots, with the first three principal components accounting for 88.6 PVE (**Figure**  
317 **6**). Changes in PC1 corresponded to differences in overall shape (conical vs. cylindrical; 66.4 PVE).  
318 Variation in PC2 was associated with the shape of the root tip from a tapered shape to a blunt,  
319 rounded shape (16.6 PVE). For PC3, changes corresponded to diameter in the longitudinal section  
320 (5.6 PVE).



## Automated image analysis for genetic studies of carrot shoot and root shape

321 Results differed slightly from findings using landmark analysis by (Horgan, 2001), in which principal  
322 components for root shape included variation for size (short and thick vs. long and thin; 72.0 PVE),  
323 tapering (cylinder vs. cone; 10.8 PVE), thickness (8.2 PVE), bending (3.4 PVE), asymmetry (2.0  
324 PVE), and tapering at the tip (0.9 PVE). Differences can be explained in part by the decision to  
325 correct for aspect ratio (i.e. the ratio of width to height), which allowed us to explain more variation  
326 in shape independent of root length and width. Disparities may also result from differences in  
327 measurement technique and in the range of root shapes represented in each study. Interestingly, our  
328 results are also similar to findings in Japanese radish (Iwata et al., 1998), which identified principal  
329 components for aspect ratio (73.9 PVE), bluntness at the distal end of the root (14.2 PVE), and  
330 swelling in the middle of the root (3.9 PVE).

### 331 **3.4 Repeatability**

332 Estimates of repeatability were moderate for most traits, ranging from low (e.g. root length) to high  
333 (e.g. shoot height) and were comparable between manual and image measurements (**Table 1, Table**  
334 **2**). For shoot traits, repeatability across environments was highest for both manual and image-  
335 derived measurements of height (0.52 and 0.59, respectively) and leaf number (0.31 and 0.49,  
336 respectively), with low values observed for image-derived measurements of shoot biomass (0.19)  
337 (**Table 1**). In general, repeatability was relatively higher within rather than across environments for  
338 most traits. For instance, petiole width, which has a low repeatability across environments, had  
339 moderate to high repeatability within environments (0.35 in WI2015 and 0.84 in CA2016).

340 Repeatability for root traits ranged from 0.01 for manual measurements of root length to 0.32 for  
341 manually measured root biomass, with a value of 0 observed for root PC2 (**Table 2**). Observations of  
342 low repeatability for root length and shape characteristics may be due to low phenotypic variation  
343 among the inbred parents, which were primarily selected for divergent shoot characteristics, and/or  
344 genotype by environment interaction (GxE). As observed for shoot traits, estimates of repeatability  
345 were generally higher within environments, supporting the importance of GxE for these phenotypes.

346 Compared to manual measurements, image derived values successfully identified the lowest ranking  
347 line for shoot height (L6038), shoot biomass (L6038), and root biomass (B7262) (**Table 1 and Table**  
348 **2**). Discrepancies between manual and image measurements, for instance between the highest line for  
349 shoot height based on manual measurements (Nbh2189A x B7262B) and based on image  
350 measurements (Nbh2189A x P6139B), may be due to differences in how the measurements were  
351 obtained (e.g. measured at the plot level in the field or for individual plants) and due the prevalence  
352 of missing observations in the WI2015 season.

### 353 **3.5 Genotyping and genetic linkage map construction**

354 A total of 116,030 SNPs were identified for 467 individuals. After filtering for missing data and  
355 allele frequency, the final data set contained 15,659 high quality SNPs. The linkage map was  
356 constructed using 461 individuals and included a total of 640 high quality SNP markers across nine  
357 chromosomes (**Figure S3**). The total distance covered was 719 cM with an average marker spacing  
358 of 1.1 cM and a maximum marker spacing of 17.7 cM (**Table S2**).

### 359 **3.6 QTL for shoot and root traits**

360 Overall, seven significant QTL on chromosomes 1, 2, 3, 4, 5, and 7 were identified for manual  
361 measurements of carrot shoot and root traits. Of these, six QTL were also detected for traits extracted  
362 computationally from images (**Figure 7**). Additionally, the use of image based measurements

## Automated image analysis for genetic studies of carrot shoot and root shape

363 resulted in the identification of two additional QTL for root PC1 and petiole width on chromosomes  
364 6 and 8, respectively. Significant QTL, including the most significant marker and corresponding 1.5  
365 LOD interval, are described in detail for shoot traits in **Table 3** and for root traits in **Table 4**. In  
366 general, the total PVE was similar for manually measured traits compared to their image-based  
367 counterparts, the notable exception being root length, for which the manual measurement only had 19  
368 PVE compared to 41 PVE for the image measurement.

369 We observed co-localization of QTL for shoot and root traits on the distal ends of chromosomes 2  
370 and 7, which was consistent for both manual and image-based measurements. Significant QTL on  
371 chromosome 2 were identified for manual measurements of shoot height, shoot biomass, leaf  
372 number, and root biomass, and for image-based measurements of shoot height, shoot area, leaf  
373 number, petiole width, petiole length, shoot PC2 (correlated with height), root length, root area, and  
374 root PC2 (corresponding to the degree of tip fill). Similarly, significant QTL on chromosome 7  
375 included manually measured shoot height, shoot biomass, and root biomass, and image measured  
376 shoot height, shoot biomass, petiole width, petiole length, root PC2 (tip fill), and root PC3  
377 (associated with root thickening). In general, the QTL on chromosomes 2 and 7 also accounted for  
378 most of the PVE. For shoot traits, this ranged from 8% for leaf number to 53% for shoot height  
379 (**Table 3**) and, for root traits, from 4% for root PC3 (root thickening) to 38% for root PC2 (tip fill)  
380 (**Table 4**). Additional significant QTL explained a relatively small proportion of the variance and are  
381 described below.

382 **Shoot traits:** For manual measurements of shoot height, a third QTL was identified on chromosome  
383 5 (5 PVE), which was not captured by the corresponding image measurement. Additional QTL for  
384 shoot biomass included regions on chromosomes 3 (6 PVE) and 4 (5 PVE), of which only the region  
385 on chromosome 3 was found for the image-extracted trait (4 PVE). This same region on  
386 chromosome 3 was also identified for petiole length (3 PVE) and for shoot PC2 (5 PVE). For the  
387 image measurement of petiole width, two QTL, which were not identified for any hand  
388 measurements, were found on chromosomes 4 (5 PVE) and 8 (6 PVE). Despite strong correlation of  
389 shoot PC1 with shoot biomass, no QTL were identified for shoot PC1.

390 **Root traits:** In contrast to the region on chromosome 7 described above, a QTL on the proximal end  
391 of chromosome 7 was identified for manually measured root length (4 PVE), but not for the  
392 corresponding image measurement. Two other QTL for root length were identified on chromosomes  
393 1 and 3 for both manual (9 PVE and 6 PVE, respectively) and image (14 PVE and 7 PVE)  
394 measurements. The same QTL on chromosome 3, which was also identified for shoot biomass and  
395 petiole length, was detected for root PC2. For image-based measurements of root length and  
396 biomass, another QTL was also identified on chromosome 4 (10 PVE and 4 PVE, respectively).

## 397 4 Discussion

398 Plant phenomics has the potential to accelerate plant improvement through increased scope,  
399 throughput, and accuracy (Bucksch et al., 2014; Fahlgren et al., 2015; Furbank and Tester, 2011).  
400 These advances are especially beneficial in specialty crop breeding, as phenotypes are often complex  
401 and population sizes are limited by the time required to obtain measurements. This advantage is  
402 further realized in biennial crops such as carrot, where breeding is accelerated to annual cycle and  
403 phenotyping occurs in the narrow window between the harvest of vegetative roots and planting of  
404 vernalized roots for seed production (Simon, 2000; Simon et al., 2008).

## Automated image analysis for genetic studies of carrot shoot and root shape

405 To facilitate crop improvement efforts in carrot, we present a pipeline to assess whole-plant  
406 morphology, which to date has lacked protocols for standardized, quantitative measurements. This  
407 method will enable more in-depth genetic and phenotypic studies in carrot by providing: (1) robust,  
408 reliable and repeatable measurements of carrot morphology and (2) augmented throughput, which  
409 improves the statistical power of subsequent analyses by increasing sample size. Additionally, the  
410 phenotypes measured by this pipeline encompass both theoretical and applied importance for  
411 improvement of crop quality and yield, providing a means to accelerate genetic gain for primary  
412 breeding targets in carrot.

### 413 **4.1 Image analysis as a promising tool to measure carrot phenotypes**

414 The efficacy of image analysis to estimate carrot shoot and root morphology was validated on 917  
415 field grown carrot plants from multiple locations and commonly used experimental designs. We  
416 anticipate that this analysis will be equally suitable for plants grown in the greenhouse or in other  
417 environments. In addition to providing measurements not attainable by hand, throughput for image  
418 analysis took approximately one third of the time needed for collection of the equivalent hand  
419 measurements. This time difference can be explained by the ability to capture multiple traits of  
420 interest from an image, which requires one step for data collection (image acquisition), compared to  
421 multiple manual measurements for individual traits, which can require several steps (e.g. biomass,  
422 which requires sampling, weighing, drying, and reweighing). Additionally, rapid processing of  
423 samples may also reduce potential errors during data entry and variation due to differences in the  
424 duration of storage prior to measurements (Bucksch et al., 2014; Fiorani and Schurr, 2013; Lobet et  
425 al., 2013). The throughput of this method could be further improved by barcoding individual plants  
426 and including a marker of known size during imaging to automatically convert pixels to metric units.

427 The high correlation between image-extracted traits and hand-measured analogs ( $r > 0.7$ ) provides  
428 evidence that this is a reliable method to capture phenotypic diversity and quantitative trait variation  
429 for important breeding targets in carrot. By enabling precise measurements for larger population  
430 sizes, the power of subsequent genetic investigations will be improved to enable more precise  
431 estimates of heritability and ultimately to better inform breeding strategies to increase genetic gain  
432 (Fiorani and Schurr, 2013; Kuijken et al., 2015). Additionally, a distinct advantage of this approach is  
433 the ability to measure shape parameters, which do not have an objective or practical hand  
434 measurement equivalent. Previous work on carrot shoot morphology includes image analysis of  
435 leaflet shape (Horgan et al., 2001) and an assessment of phenotypic and genotypic diversity for shoot  
436 height in commercially available carrot germplasm (Luby et al., 2016). However, this is the first  
437 method to implement a high-throughput, quantitative assessment of carrot shoot architecture. The  
438 capability to capture variation for shoot morphology will benefit future investigations into the  
439 improvement of crop establishment and weed competitive ability in carrot, which are increasingly  
440 important for successful crop production (Colquhoun et al., 2017; Turner et al., 2018).

441 Carrot root shape has been extensively studied in the context of variety classification and crop  
442 quality. Previous work to quantify root shape includes the use of power law curves (Bleasdale and  
443 Thompson, 1963), machine vision (Howarth et al., 1992), landmark analysis (Horgan, 2001; Horgan  
444 et al., 2001), X-ray computed tomography (Rosenfeld et al., 2002), and quality assessment using  
445 geometric criteria (Koszela et al., 2013). The scope of these approaches was restricted to assessing  
446 varietal and quality differences in root shape, independent of haulm characteristics, and was limited  
447 to commercially available varieties. We build upon these methods by characterizing root shape  
448 without landmarks (Horgan et al., 2001), expanding the methodology to capture shoot architecture,  
449 and demonstrating the detection of subtle but biologically important variation in diverse genetic

## Automated image analysis for genetic studies of carrot shoot and root shape

450 resource populations. Deviations from previous reports of principal components for carrot root shape  
451 can be partly explained by the decision to normalize for root length and width (i.e. aspect ratio), a  
452 step which can be omitted if aspect ratio is a trait of interest. It is also worth noting that the scope of  
453 our approach could be improved with the inclusion of additional root classes, such as Paris Market  
454 and Kuroda types (Simon et al., 2008).

### 455 **4.2 Identification of QTL for shoot and root characteristics**

456 Vegetative plant organs often evolve as phenotypic modules, and consequently tend to be highly  
457 correlated and share evolutionary tracts (Bouchet et al., 2017). We observed strong correlations  
458 among shoot and root biomass and leaf number, consistent with recently reported results for  
459 developmental phenotypes in maize (Bouchet et al., 2017) and with the general observation that plant  
460 organs tend to evolve as phenotypic modules (Murren, 2002; Pigliucci and Preston). Despite the  
461 strong correlation between shoot and root biomass, the deviation of this linear relationship from unity  
462 could also suggest that carrot growth may depart from a steady state, with biomass allocation in the  
463 shoot not directly proportional to biomass in the storage root (Poorter et al., 2012). Alternatively, this  
464 disparity could also result from an inability to account for fibrous root mass, which is lost during  
465 harvest.

466 For the F<sub>2</sub> population in this study, a total of seven unique QTL were detected for carrot shoot and  
467 root morphology, which are traits of primary interest to improve carrot quality and yield. Of these,  
468 three QTL had large effects and accounted for over 10 PVE for a given trait, while the remainder had  
469 small to moderate effects. QTL for image measurements tended to overlap with QTL for manual  
470 measurements, providing confirmation that this pipeline can be used reliably for genetic studies of  
471 shoot and root morphology in carrot. Notably, QTL for several traits in this study had various  
472 amounts of overlap with previously identified QTL for root swelling on chromosomes 2, 3, 4, and 5  
473 (Macko-Podgórní et al., 2017).

474 We report evidence for the co-localization of QTL for shoot traits (height, leaf number, biomass,  
475 petiole width, and petiole length) and root characteristics (length, biomass, and tip fill) on the distal  
476 end for the long arm of chromosome 2. This suggests a pleiotropic basis and/or tight genetic linkage  
477 for the morphological integration of shoot and root architecture in carrot. This finding is also  
478 consistent with the recent identification of a QTL and selective sweep on a nearby region of  
479 chromosome 2, which included the identification of a candidate domestication gene in carrot  
480 (*DcAHLc1*) (Macko-Podgórní et al., 2017). *DcAHLc1* is a regulatory gene in the *AT-HOOK MOTIF*  
481 *CONTAINING NUCLEAR LOCALIZED (AHL)* family, which is highly conserved across monocot  
482 and dicot species and influences plant growth and development (Zhao et al 2012). Members of the  
483 AHL gene family have been linked to shoot and root characteristics in other species, including  
484 hypocotyl elongation (Street et al., 2008; Xiao et al., 2009), increased plant biomass (Jiang et al.,  
485 2004), root growth (Zhou et al., 2013), and phytohormone regulation (Matsushita et al., 2007;  
486 Rashotte et al., 2003; Vom Endt et al., 2007). Interestingly, in this study we also find a member of  
487 the AHL gene family within the confidence interval for the QTL identified on chromosome 2 (**Table**  
488 **S3**). While our findings support evidence that the region on chromosome 2 is important for carrot  
489 growth and development, they differ from the findings of Macko-Podgórní et al. in two important  
490 ways: (1) we did not observe overlap between the support intervals of significant QTL on  
491 chromosome 2 in this study and the *DcAHLc1* gene and (2) we did not find any significant QTL for  
492 image-based measurements of root width, although we did observe a significant QTL for root PC2,  
493 which captures variation in the amount of tapering (or swelling) at the tip of the root. A likely  
494 explanation for not finding the *DcAHLc1* gene to contribute to root shape in our study, which used a

## Automated image analysis for genetic studies of carrot shoot and root shape

495 cross between domesticated breeding stocks, is that Macko-Podgórní et al. (2017) used a wild x  
496 domesticated cross (*D. carota* subsp. *commutatus* x 2874B), in which the *DcAHLc1* gene is  
497 segregating. Together, these findings suggest the possibility of additional candidate gene(s) on  
498 chromosome 2 and tight linkage among genes influencing carrot shoot and root development, which  
499 are inherited together as a suite of traits.

500 By providing a foundation for future genetic mapping and genome-wide association studies, the  
501 significant QTL detected in this study will contribute to the development of marker-assisted selection  
502 and fine mapping efforts for carrot shoot and root morphology. Further research will be necessary to  
503 validate the prevalence and importance these regions in different genetic backgrounds, over the  
504 course of developmental stages, and across environments.

### 505 4.3 Conclusions and future directions

506 The development of a high-throughput image analysis pipeline for carrot shoot and root morphology  
507 provides new opportunities for crop improvement and to elucidate the underlying genetics for  
508 quantitative traits. The design for image collection is simple, low-cost, and could be easily adapted  
509 for use in other crops with similar morphology. Ideally, this methodology could be expanded to other  
510 important crops, e.g. cassava, beet, radish, and other members of the Apiaceae family, such as celery,  
511 parsnip, parsley, and cilantro, which have widespread culinary uses but lack substantial research  
512 investment. Images are also an ideal medium to facilitate collaborations, as they transfer  
513 multidimensional information for which analysis is standardized and automated (Lobet et al., 2013).  
514 As such, the ability to analyze and share carrot images through public repositories is an opportunity  
515 to increase the scope, archival, and reproducibility of carrot research.

516 Data from this method can be used in numerous applications for carrot breeding and research.  
517 Morphological variation can be rapidly assessed and catalogued for diverse genetic backgrounds,  
518 providing a resource to better inform experimental design and population selection for more in-depth  
519 analysis. This pipeline can be used in tandem with physiological studies, for instance to evaluate the  
520 effects of gibberellic acid and cytokinin, which are known to influence carrot shoot and root  
521 morphology (Wang et al., 2015b, 2015a). Phenotypic data can also be integrated into predictive  
522 models for carrot growth and development by imaging plants at various developmental stages,  
523 permitting further investigation of allometric relationships between the shoot and root. In future  
524 studies, it will also be important to consider the relationship between fibrous root architecture, which  
525 provides a source of photosynthates, water, and soil-borne nutrients, and the storage root, which  
526 serves as a sink for these metabolites that are essential for vegetative and reproductive growth.

527 This approach is specifically tailored for a carrot breeding program, but could also complement  
528 existing image analysis software and methods for detailed analyses. For example, research on the  
529 genetic basis of lateral branching in carrot roots is underway using RootNav (Pound et al., 2013) and  
530 SmartRoot (Lobet et al., 2011), which are well established methodologies to quantify root system  
531 architecture. Potential improvements and expansions of our method include incorporation of uniform  
532 lighting and a marker of known size, as well as extension of carrot phenotyping to field-scale  
533 measurements over the course of the growing season.

534 The method presented in this study provides an initial step in automated phenotyping for carrot. By  
535 enabling rapid, precise measurements of important agronomic characteristics in carrot, this platform  
536 will allow carrot breeders to measure greater population sizes, increasing throughput and supporting  
537 downstream analyses.

## Automated image analysis for genetic studies of carrot shoot and root shape

### 538 **5 Data Availability**

539 All images, scripts, and sequence data used in this study are publicly available. Images are available  
540 at <https://de.cyverse.org/dl/d/2F1B4398-9D2E-4BF4-BFFF-65F507DB6865/sampleCarrotImages.zip>  
541 and will also be deposited in the Dryad digital repository (<https://datadryad.org/>). Custom algorithms  
542 for image analysis are accessible on CyVerse as part of the PhytoMorph ToolKit. Scripts for data  
543 processing, visualization, and QTL mapping are available on GitHub at  
544 <https://github.com/mishaploid/carrot-image-analysis>. SNPs from the F<sub>2</sub> mapping population will be  
545 deposited as VCF files on FigShare.

### 546 **6 Conflict of Interest**

547 The authors declare that the research was conducted in the absence of any commercial or financial  
548 relationships that could be construed as a potential conflict of interest.

### 549 **7 Author Contributions**

550 SDT, PWS, EPS, and NDM conceived and designed the study. NDM developed custom algorithms  
551 for image analysis. SDT and SLE gathered phenotypic and genotypic data. DAS performed SNP  
552 calling and filtering. SDT, SLE, and NDM performed the statistical analyses. SDT wrote the  
553 manuscript with contributions from the other authors. All authors read and approved the submitted  
554 version.

### 555 **8 Funding**

556 This research was supported by the United States Department of Agriculture National Institute of  
557 Food and Agriculture under award number 2011-51300-30903 of the Organic Agriculture and  
558 Research Extension Initiative and was conducted using resources provided by the Open Science Grid,  
559 which is supported by the National Science Foundation award 1148698, and the U.S. Department of  
560 Energy's Office of Science.

### 561 **9 Acknowledgments**

562 The authors are grateful to Adam Bolton, Jenna Hershberger, Erin Lalor, Leah Weston, Robynn  
563 Schwarzmann, Hailey Shanovich, Grace Gustafson, and Sam Veum for assistance in data collection,  
564 to Charlene Grahn and Julie Dawson for helpful advice on the project, and to Rob Kane (deceased)  
565 and Tom Horejsi for technical support and field management.

566 **10 References**

- 567 Alessandro, M. S., Galmarini, C. R., Iorizzo, M., and Simon, P. W. (2013). Molecular mapping of  
568 vernalization requirement and fertility restoration genes in carrot. *Theor Appl Genet* 126.  
569 doi:10.1007/s00122-012-1989-1.
- 570 Arbizu, C. I., Ellison, S. L., Senalik, D., Simon, P. W., and Spooner, D. M. (2016). Genotyping-by-  
571 sequencing provides the discriminating power to investigate the subspecies of *Daucus carota*  
572 (Apiaceae). *BMC Evol. Biol.* 16, 234. doi:10.1186/s12862-016-0806-x.
- 573 Arends, D., Prins, P., Jansen, R. C., and Broman, K. W. (2010). R/qtl: high-throughput multiple QTL  
574 mapping. *Bioinformatics* 26, 2990–2992. doi:10.1093/bioinformatics/btq565.
- 575 Banga, O. (1957). Origin of the European cultivated carrot. *Euphytica* 6, 54–63.  
576 doi:10.1007/BF00179518.
- 577 Bell, C. E., Boutwell, B. E., Ogbuchiekwe, E. J., and McGiffen, M. E. (2000). Weed control in  
578 carrots: the efficacy and economic value of linuron. *HortScience* 35, 1089–1091.
- 579 Bellinder, R. R., Kirkwyland, J. J., and Wallace, R. W. (1997). Carrot (*Daucus carota*) and weed  
580 response to linuron and metribuzin applied at different crop stages. *Weed Technol.* 11, 235–  
581 240.
- 582 Bhandarkar, S. M., Koh, J., and Suk, M. (1996). A hierarchical neural network and its application to  
583 image segmentation. *Robotics* 41, 337–355. doi:10.1016/0378-4754(95)00083-6.
- 584 Bleasdale, J. K. A., and Thompson, R. (1963). An objective method of recording and comparing the  
585 shapes of carrot roots. *J. Hortic. Sci.* 38, 232–241. doi:10.1080/00221589.1963.11514074.
- 586 Boiteux, L. S., Fonseca, M. E. N., and Simon, P. W. (1999). Effects of plant tissue and DNA  
587 purification method on randomly amplified polymorphic DNA-based genetic fingerprinting  
588 analysis in carrot. *J. Am. Soc. Hortic. Sci.* 124, 32–38.
- 589 Bouchet, S., Bertin, P., Presterl, T., Jamin, P., Coubriche, D., Gouesnard, B., et al. (2017).  
590 Association mapping for phenology and plant architecture in maize shows higher power for  
591 developmental traits compared with growth influenced traits. *Heredity* 118, 249–259.
- 592 Bouteillé, M., Rolland, G., Balsera, C., Loudet, O., and Muller, B. (2012). Disentangling the  
593 intertwined genetic bases of root and shoot growth in *Arabidopsis*. *PLOS ONE* 7, e32319.  
594 doi:10.1371/journal.pone.0032319.
- 595 Bradbury, P. J., Zhang, Z., Kroon, D. E., Casstevens, T. M., Ramdoss, Y., and Buckler, E. S. (2007).  
596 TASSEL: software for association mapping of complex traits in diverse samples.  
597 *Bioinformatics* 23. doi:10.1093/bioinformatics/btm308.
- 598 Bradeen, J. M., and Simon, P. W. (1998). Conversion of an AFLP fragment linked to the carrot Y<sub>2</sub>  
599 locus to a simple, codominant, PCR-based marker form. *Theor. Appl. Genet.* 97, 960–967.  
600 doi:10.1007/s001220050977.
- 601 Broman, K., and Sen, Ś. (2009). *A guide to QTL mapping with R/qtl*. New York, NY: Springer.

## Automated image analysis for genetic studies of carrot shoot and root shape

- 602 Bucksch, A., Burridge, J., York, L. M., Das, A., Nord, E., Weitz, J. S., et al. (2014). Image-based  
603 high-throughput field phenotyping of crop roots. *Plant Physiol.*, pp.114.243519.  
604 doi:10.1104/pp.114.243519.
- 605 Buishand, J., and Gabelman, W. (1979). Investigations on the inheritance of color and carotenoid  
606 content in phloem and xylem of carrot roots (*Daucus carota* L.). *Euphytica* 28, 611–632.
- 607 Cavagnaro, P. F., Iorizzo, M., Yildiz, M., Senalik, D., Parsons, J., Ellison, S., et al. (2014). A gene-  
608 derived SNP-based high resolution linkage map of carrot including the location of QTL  
609 conditioning root and leaf anthocyanin pigmentation. *BMC Genomics* 15, 1118.  
610 doi:10.1186/1471-2164-15-1118.
- 611 Churchill, G. A., and Doerge, R. W. (1994). Empirical threshold values for quantitative trait  
612 mapping. *Genetics* 138, 963.
- 613 Colquhoun, J. B., Rittmeyer, R. A., and Heider, D. J. (2017). Tolerance and suppression of weeds  
614 varies among carrot varieties. *Weed Technol.* 31, 897–902. doi:10.1017/wet.2017.54.
- 615 Danecek, P., Auton, A., Abecasis, G., Albers, C. A., Banks, E., DePristo, M. A., et al. (2011). The  
616 variant call format and VCFtools. *Bioinformatics* 27. doi:10.1093/bioinformatics/btr330.
- 617 Dignat, G., Welcker, C., Sawkins, M., Ribaut, J. M., and Tardieu, F. (2013). The growths of leaves,  
618 shoots, roots and reproductive organs partly share their genetic control in maize plants. *Plant*  
619 *Cell Environ.* 36, 1105–1119. doi:10.1111/pce.12045.
- 620 Ellison, S., Senalik, D., Bostan, H., Iorizzo, M., and Simon, P. (2017). Fine mapping, transcriptome  
621 analysis, and marker development for  $Y_2$ , the gene that conditions  $\beta$ -carotene accumulation in  
622 carrot (*Daucus carota* L.). *G3 GenesGenomesGenetics* 7, 2665. doi:10.1534/g3.117.043067.
- 623 Elshire, R. J., Glaubitz, J. C., Sun, Q., Poland, J. A., Kawamoto, K., Buckler, E. S., et al. (2011). A  
624 robust, simple genotyping-by-sequencing (GBS) approach for high diversity species. *PLOS*  
625 *ONE* 6, e19379. doi:10.1371/journal.pone.0019379.
- 626 Enquist, B. J., and Niklas, K. J. (2002). Global allocation rules for patterns of biomass partitioning in  
627 seed plants. *Science* 295, 1517. doi:10.1126/science.1066360.
- 628 Fahlgren, N., Gehan, M. A., and Baxter, I. (2015). Lights, camera, action: high-throughput plant  
629 phenotyping is ready for a close-up. *Curr. Opin. Plant Biol.* 24, 93–99.  
630 doi:10.1016/j.pbi.2015.02.006.
- 631 Falster, D. S., and Westoby, M. (2003). Leaf size and angle vary widely across species: what  
632 consequences for light interception? *New Phytol.* 158, 509–525. doi:10.1046/j.1469-  
633 8137.2003.00765.x.
- 634 Fiorani, F., and Schurr, U. (2013). Future scenarios for plant phenotyping. *Annu. Rev. Plant Biol.* 64,  
635 267–291. doi:10.1146/annurev-arplant-050312-120137.
- 636 Furbank, R. T., and Tester, M. (2011). Phenomics – technologies to relieve the phenotyping  
637 bottleneck. *Trends Plant Sci.* 16, 635–644. doi:10.1016/j.tplants.2011.09.005.



## Automated image analysis for genetic studies of carrot shoot and root shape

- 638 Gage, J. L., Miller, N. D., Spalding, E. P., Kaeppler, S. M., and de Leon, N. (2017). TIPS: a system  
639 for automated image-based phenotyping of maize tassels. *Plant Methods* 13, 21.  
640 doi:10.1186/s13007-017-0172-8.
- 641 Glaubitz, J. C., Casstevens, T. M., Lu, F., Harriman, J., Elshire, R. J., Sun, Q., et al. (2014).  
642 TASSEL-GBS: a high capacity genotyping by sequencing analysis pipeline. *PLoS One* 9.  
643 doi:10.1371/journal.pone.0090346.
- 644 Hole, C. C., Barnes, A., Thomas, T. H., Scott, P. A., and Rankin, W. E. F. (1983). Dry matter  
645 distribution between the shoot and storage root of carrot (*Daucus carota* L.) I. comparison of  
646 varieties. *Ann. Bot.* 51, 175–187.
- 647 Horgan, G. W. (2001). The statistical analysis of plant part appearance — a review. *Comput.*  
648 *Electron. Agric.* 31, 169–190. doi:10.1016/S0168-1699(00)00190-3.
- 649 Horgan, G. W., Talbot, M., and Davey, J. C. (2001). Use of statistical image analysis to discriminate  
650 carrot cultivars. *Comput. Electron. Agric.* 31, 191–199. doi:10.1016/S0168-1699(00)00191-5.
- 651 Howarth, M. S., Brandon, J. R., Searcy, S. W., and Kehtarnavaz, N. (1992). Estimation of tip shape  
652 for carrot classification by machine vision. *J. Agric. Eng. Res.* 53, 123–139.  
653 doi:10.1016/0021-8634(92)80078-7.
- 654 Idrissi, O., Udupa, S. M., De Keyser, E., McGee, R. J., Coyne, C. J., Saha, G. C., et al. (2016).  
655 Identification of quantitative trait loci controlling root and shoot traits associated with drought  
656 tolerance in a lentil (*Lens culinaris* Medik.) recombinant inbred line population. *Front. Plant*  
657 *Sci.* 7, 1174. doi:10.3389/fpls.2016.01174.
- 658 Iorizzo, M., Ellison, S., Senalik, D., Zeng, P., Satapoomin, P., Huang, J., et al. (2016). A high-quality  
659 carrot genome assembly provides new insights into carotenoid accumulation and asterid  
660 genome evolution. *Nat Genet* 48. doi:10.1038/ng.3565.
- 661 Iorizzo, M., Senalik, D. A., Ellison, S. L., Grzebelus, D., Cavagnaro, P. F., Allender, C., et al. (2013).  
662 Genetic structure and domestication of carrot (*Daucus carota* subsp. *sativus*) (Apiaceae). *Am*  
663 *J Bot* 100. doi:10.3732/ajb.1300055.
- 664 Iwata, H., Niikura, S., Matsuura, S., Takano, Y., and Ukai, Y. (1998). Evaluation of variation of root  
665 shape of Japanese radish (*Raphanus sativus* L.) based on image analysis using elliptic Fourier  
666 descriptors. *Euphytica* 102, 143–149. doi:10.1023/A:1018392531226.
- 667 Jansen, R. C., and Stam, P. (1994). High resolution of quantitative traits into multiple loci via interval  
668 mapping. *Genetics* 136, 1447.
- 669 Jiang, C. Z., Heard, J., Ratcliffe, O., Gutterson, N., Hempel, F., Kumimoto, R., et al. (2004). Methods  
670 for modifying plant biomass and abiotic stress. Available at:  
671 <https://www.google.com/patents/US20040128712>.
- 672 Just, B. J., Santos, C. A. F., Fonseca, M. E. N., Boiteux, L. S., Oloizia, B. B., and Simon, P. W.  
673 (2007). Carotenoid biosynthesis structural genes in carrot (*Daucus carota*): isolation,  
674 sequence-characterization, single nucleotide polymorphism (SNP) markers and genome  
675 mapping. *Theor Appl Genet* 114. doi:10.1007/s00122-006-0469-x.

**Automated image analysis for genetic studies of carrot shoot and root shape**

- 676 Just, B. J., Santos, C. A. F., Yandell, B. S., and Simon, P. W. (2009). Major QTL for carrot color are  
677 positionally associated with carotenoid biosynthetic genes and interact epistatically in a  
678 domesticated × wild carrot cross. *Theor. Appl. Genet.* 119, 1155–1169. doi:10.1007/s00122-  
679 009-1117-z.
- 680 Kosambi, D. D. (1943). The estimation of map distances from recombination values. *Ann. Eugen.* 12,  
681 172–175. doi:10.1111/j.1469-1809.1943.tb02321.x.
- 682 Koszela, K., Weres, J., Boniecki, P., Zaborowicz, M., Przybył, J., Dach, J., et al. (2013). Computer  
683 image analysis in the quality procedure for selected carrot varieties. in *Proc SPIE 8878*,  
684 887811.
- 685 Kuijken, R. C. P., Eeuwijk, F. A. van, Marcelis, L. F. M., and Bouwmeester, H. J. (2015). Root  
686 phenotyping: from component trait in the lab to breeding. *J. Exp. Bot.*, erv239.  
687 doi:10.1093/jxb/erv239.
- 688 Li, J., Xie, Y., Dai, A., Liu, L., and Li, Z. (2009). Root and shoot traits responses to phosphorus  
689 deficiency and QTL analysis at seedling stage using introgression lines of rice. *J. Genet.*  
690 *Genomics* 36, 173–183. doi:10.1016/S1673-8527(08)60104-6.
- 691 Lobet, G., Draye, X., and Périlleux, C. (2013). An online database for plant image analysis software  
692 tools. *Plant Methods* 9, 38. doi:10.1186/1746-4811-9-38.
- 693 Lobet, G., Pages, L., and Draye, X. (2011). A novel image-analysis toolbox enabling quantitative  
694 analysis of root system architecture. *PLANT Physiol.* 157, 29–39.  
695 doi:10.1104/pp.111.179895.
- 696 Luby, C. H., Dawson, J. C., and Goldman, I. L. (2016). Assessment and accessibility of phenotypic  
697 and genotypic diversity of carrot (*Daucus carota* L. var. *sativus*) cultivars commercially  
698 available in the United States. *PLOS ONE* 11, e0167865. doi:10.1371/journal.pone.0167865.
- 699 Lynch, J. (1995). Root architecture and plant productivity. *Plant Physiol.* 109, 7–13.  
700 doi:10.1104/pp.109.1.7.
- 701 Lynch, J. P. (2007). Rhizoeconomics: the roots of shoot growth limitations. *HortScience* 42, 1107–  
702 1109.
- 703 Macko-Podgórn, A., Iorizzo, M., Krzysztof, S., Simon, P. W., and Grzebelus, D. (2014). Conversion  
704 of a diversity arrays technology marker differentiating wild and cultivated carrots to a co-  
705 dominant cleaved amplified polymorphic site marker. *Acta Biochim. Pol.* 61, 19–22.
- 706 Macko-Podgórn, A., Machaj, G., Stelmach, K., Senalik, D., Grzebelus, E., Iorizzo, M., et al. (2017).  
707 Characterization of a genomic region under selection in cultivated carrot (*Daucus carota*  
708 subsp. *sativus*) reveals a candidate domestication gene. *Front. Plant Sci.* 8, 12.  
709 doi:10.3389/fpls.2017.00012.
- 710 Manavalan, L. P., Prince, S. J., Musket, T. A., Chaky, J., Deshmukh, R., Vuong, T. D., et al. (2015).  
711 Identification of novel QTL governing root architectural traits in an interspecific soybean  
712 population. *PLOS ONE* 10, e0120490. doi:10.1371/journal.pone.0120490.

## Automated image analysis for genetic studies of carrot shoot and root shape

- 713 Matsushita, A., Furumoto, T., Ishida, S., and Takahashi, Y. (2007). AGF1, an AT-hook protein, is  
714 necessary for the negative feedback of *AtGA3ox1* encoding GA 3-Oxidase. *Plant Physiol.*  
715 143, 1152–1162. doi:10.1104/pp.106.093542.
- 716 Merchant, N., Lyons, E., Goff, S., Vaughn, M., Ware, D., Micklos, D., et al. (2016). The iPlant  
717 Collaborative: cyberinfrastructure for enabling data to discovery for the life sciences. *PLOS*  
718 *Biol.* 14, e1002342. doi:10.1371/journal.pbio.1002342.
- 719 Miller, N. D., Haase, N. J., Lee, J., Kaeppeler, S. M., de Leon, N., and Spalding, E. P. (2017). A  
720 robust, high-throughput method for computing maize ear, cob, and kernel attributes  
721 automatically from images. *Plant J.* 89, 169–178. doi:10.1111/tpj.13320.
- 722 Moore, C. R., Gronwall, D. S., Miller, N. D., and Spalding, E. P. (2013). Mapping quantitative trait  
723 loci affecting *Arabidopsis thaliana* seed morphology features extracted computationally from  
724 images. *G3 GenesGenomesGenetics* 3, 109–118. doi:10.1534/g3.112.003806.
- 725 Murray, M. G., and Thompson, W. F. (1980). Rapid isolation of high molecular weight plant DNA.  
726 *Nucleic Acids Res.* 8, 4321–4325.
- 727 Murren, C. (2002). Phenotypic integration in plants. *Plant Species Biol.* 17, 89–99.  
728 doi:10.1046/j.1442-1984.2002.00079.x.
- 729 Naz, A. A., Arifuzzaman, M., Muzammil, S., Pillen, K., and Léon, J. (2014). Wild barley  
730 introgression lines revealed novel QTL alleles for root and related shoot traits in the  
731 cultivated barley (*Hordeum vulgare* L.). *BMC Genet.* 15, 107. doi:10.1186/s12863-014-0107-  
732 6.
- 733 Pigliucci, M., and Preston, K. *Phenotypic integration: studying the ecology and evolution of complex*  
734 *phenotypes*. Oxford, UK: Oxford University Press.
- 735 Poorter, H., Niklas, K. J., Reich, P. B., Oleksyn, J., Poot, P., and Mommer, L. (2012). Biomass  
736 allocation to leaves, stems and roots: meta-analyses of interspecific variation and  
737 environmental control. *New Phytol.* 193, 30–50. doi:10.1111/j.1469-8137.2011.03952.x.
- 738 Pordes, R., Petravick, D., Kramer, B., Olson, D., Livny, M., Roy, A., et al. (2007). The open science  
739 grid. *J. Phys. Conf. Ser.* 78, 12057.
- 740 Pound, M. P., French, A. P., Atkinson, J., Wells, D. M., Bennet, J. M., and Pridmore, T. (2013).  
741 RootNav: Navigating images of complex root architectures. *Plant Physiol* 162.  
742 doi:10.1104/pp.113.221531.
- 743 R Core Team (2016). *R: A language and environment for statistical computing*. R Foundation for  
744 Statistical Computing, Vienna, Austria Available at: <http://www.R-project.org/>.
- 745 Rajasekar, A., Moore, R., Hou, C., Lee, C. A., Marciano, R., de Torcy, A., et al. (2010). iRODS  
746 Primer: integrated rule-oriented data system. *Synth. Lect. Inf. Concepts Retr. Serv.* 2, 1–143.
- 747 Rashotte, A. M., Carson, S. D. B., To, J. P. C., and Kieber, J. J. (2003). Expression profiling of  
748 cytokinin action in *Arabidopsis*. *Plant Physiol.* 132, 1998–2011. doi:10.1104/pp.103.021436.

**Automated image analysis for genetic studies of carrot shoot and root shape**

- 749 Rogers, P., and Stevenson, W. (2006). Weather-based fungicide spray programs for control of two  
750 foliar diseases on carrot cultivars differing in susceptibility. *Plant Dis.* 90, 358–364.
- 751 Rosenfeld, H. J., Dalen, K. S., and Haffner, K. (2002). The growth and development of carrot roots.  
752 *Gartenbauwissenschaft* 67, 11–16.
- 753 Ruta, N., Stamp, P., Liedgens, M., Fracheboud, Y., and Hund, A. (2010). Collocations of QTLs for  
754 seedling traits and yield components of tropical maize under water stress conditions. *Crop*  
755 *Sci.* 50, 1385–1392. doi:10.2135/cropsci2009.01.0036.
- 756 Schneider, C. A., Rasband, W. S., and Eliceiri, K. W. (2012). NIH Image to ImageJ: 25 years of  
757 image analysis. *Nat Meth* 9, 671–675. doi:10.1038/nmeth.2089.
- 758 Sfiligoi, I., Bradley, D. C., Holzman, B., Mhashilkar, P., Padhi, S., and Wurthwein, F. (2009). The  
759 pilot way to grid resources using glideinWMS. in *2009 WRI World Congress on Computer*  
760 *Science and Information Engineering*, 428–432. doi:10.1109/CSIE.2009.950.
- 761 Simon, P. W. (2000). Domestication, historical development, and modern breeding of carrot. *Plant*  
762 *Breed Rev* 19, 157–190.
- 763 Simon, P. W., Freeman, R. E., Vieira, J. V., Boiteux, L. S., Briard, M., Nothnagel, T., et al. (2008).  
764 “Carrot,” in *Vegetables II: Fabaceae, Liliaceae, Solanaceae, and Umbelliferae*, eds. J.  
765 Prohens and F. Nuez (New York, NY: Springer), 327–357. Available at:  
766 [http://dx.doi.org/10.1007/978-0-387-74110-9\\_8](http://dx.doi.org/10.1007/978-0-387-74110-9_8).
- 767 Street, I. H., Shah, P. K., Smith, A. M., Avery, N., and Neff, M. M. (2008). The AT-hook-containing  
768 proteins SOB3/AHL29 and ESC/AHL27 are negative modulators of hypocotyl growth in  
769 *Arabidopsis*. *Plant J.* 54, 1–14. doi:10.1111/j.1365-313X.2007.03393.x.
- 770 Swanton, C. J., O’Sullivan, J., and Robinson, D. E. (2010). The critical weed-free period in carrot.  
771 *Weed Sci.* 58, 229–233. doi:10.1614/WS-09-098.1.
- 772 Thain, D., Tannenbaum, T., and Livny, M. (2005). Distributed computing in practice: the Condor  
773 experience. *Concurr. Comput. Pract. Exp.* 17, 323–356. doi:10.1002/cpe.938.
- 774 The MathWorks Inc. (2016). *MATLAB version 9.0*. Natick, Massachusetts: The MathWorks Inc.
- 775 Turner, S. D., Maurizio, P. L., Valdar, W., Yandell, B. S., and Simon, P. W. (2018). Dissecting the  
776 genetic architecture of shoot growth in carrot (*Daucus carota* L.) using a diallel mating  
777 design. *G3 GenesGenomesGenetics* 8, 411. doi:10.1534/g3.117.300235.
- 778 Van Ooijen, J. (2011). *JoinMap 4.1: Software for the calculation of genetic linkage maps in*  
779 *experimental populations*. Wageningen, Netherlands: Kyazma B.V.
- 780 Vavilov, N. (1992). *Origin and geography of cultivated plants.*, ed. V. Dorofeyev Great Britain:  
781 Cambridge University Press.
- 782 Vom Endt, D., Soares e Silva, M., Kijne, J. W., Pasquali, G., and Memelink, J. (2007). Identification  
783 of a bipartite jasmonate-responsive promoter element in the *Catharanthus roseus* ORCA3

**Automated image analysis for genetic studies of carrot shoot and root shape**

- 784 transcription factor gene that interacts specifically with AT-hook DNA-binding proteins.  
785 *Plant Physiol.* 144, 1680–1689. doi:10.1104/pp.107.096115.
- 786 Voorrips, R. (2002). MapChart: software for the graphical presentation of linkage maps and QTLs. *J*  
787 *Hered* 93, 77–78.
- 788 Wang, G.-L., Sun, S., Xing, G.-M., Wu, X.-J., Wang, F., and Xiong, A.-S. (2015a). Morphological  
789 characteristics, anatomical structure, and gene expression: novel insights into cytokinin  
790 accumulation during carrot growth and development. *PLOS ONE* 10, e0134166.  
791 doi:10.1371/journal.pone.0134166.
- 792 Wang, G.-L., Xiong, F., Que, F., Xu, Z.-S., Wang, F., and Xiong, A.-S. (2015b). Morphological  
793 characteristics, anatomical structure, and gene expression: novel insights into gibberellin  
794 biosynthesis and perception during carrot growth and development. *Hortic. Res.* 2, 15028.  
795 doi:10.1038/hortres.2015.28.
- 796 Wold, H. (1982). “Soft modelling, the basic design and some extensions,” in *Systems under indirect*  
797 *observation*, eds. K.-G. Jöreskog and H. Wold (North-Holland, Amsterdam).
- 798 Wold, S., Ruhe, A., Wold, H., and Dunn, I. W. (1984). The collinearity problem in linear regression.  
799 The partial least squares (PLS) approach to generalized inverses. *SIAM J. Sci. Stat. Comput.*  
800 5, 735–743. doi:10.1137/0905052.
- 801 Xiao, C., Chen, F., Yu, X., Lin, C., and Fu, Y.-F. (2009). Over-expression of an AT-hook gene,  
802 *AHL22*, delays flowering and inhibits the elongation of the hypocotyl in *Arabidopsis thaliana*.  
803 *Plant Mol. Biol.* 71, 39–50. doi:10.1007/s11103-009-9507-9.
- 804 Yildiz, M., Willis, D. K., Cavagnaro, P. F., Iorizzo, M., Abak, K., and Simon, P. W. (2013).  
805 Expression and mapping of anthocyanin biosynthesis genes in carrot. *Theor. Appl. Genet.*  
806 126, 1689–1702. doi:10.1007/s00122-013-2084-y.
- 807 York, L., Nord, E., and Lynch, J. (2013). Integration of root phenes for soil resource acquisition.  
808 *Front. Plant Sci.* 4, 355. doi:10.3389/fpls.2013.00355.
- 809 Zhou, J., Wang, X., Lee, J.-Y., and Lee, J.-Y. (2013). Cell-to-cell movement of two interacting AT-  
810 hook factors in *Arabidopsis* root vascular tissue patterning. *Plant Cell* 25, 187–201.  
811 doi:10.1105/tpc.112.102210.

812

## Automated image analysis for genetic studies of carrot shoot and root shape

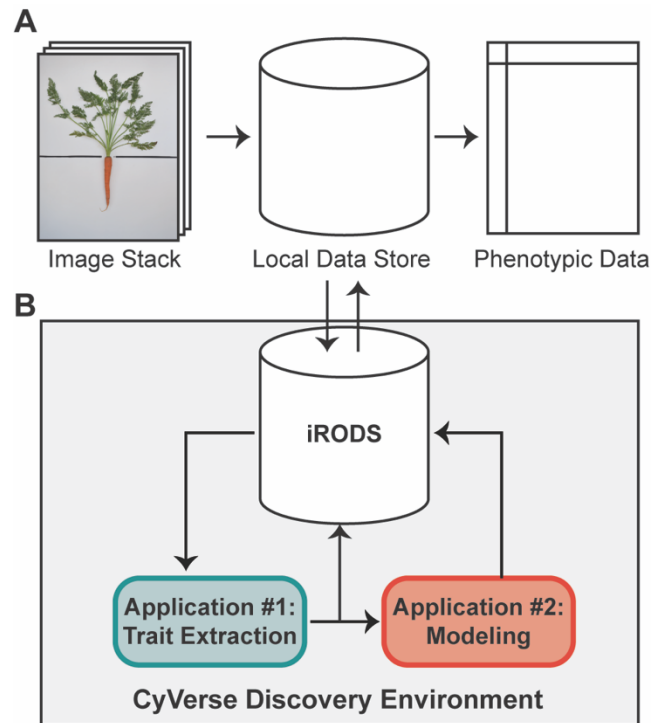

813

814 **Figure 1:** A high-throughput workflow to measure carrot morphology from images. (A) A user  
815 collects a stack of individual carrot images, which are uploaded from a local data store to the iRODS  
816 data system on CyVerse for trait extraction. Following image processing, quantitative data is returned  
817 to the user for downstream analyses. (B) Once uploaded to CyVerse, images are processed in the  
818 Discovery Environment using custom algorithms via a high-throughput computing (HTC) resource.  
819 The workflow is split into two applications: the first extracts traits which are directly measured from  
820 the image (e.g. area, bounding box, etc.), while the second uses a regression model built from a  
821 validation set of 100 ground-truth measurements to predict leaf number, petiole length, and petiole  
822 width.

## Automated image analysis for genetic studies of carrot shoot and root shape

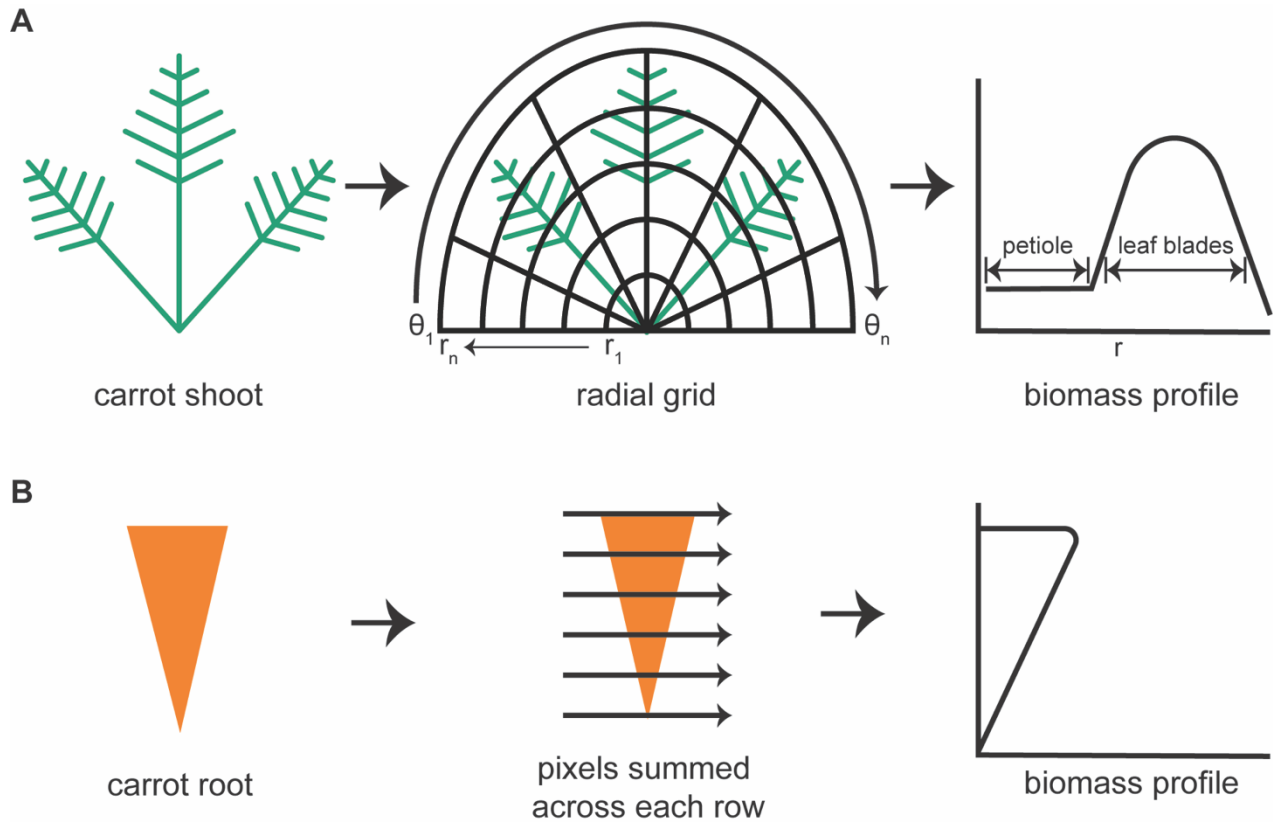

823

824 **Figure 2:** Steps to generate biomass profiles for the shoot and root of individual carrot plants. **(A)**  
825 An image mask of a carrot shoot is superimposed with half of an elliptical grid. Holding each radius  
826 ( $r$ ) of the grid constant, the image mask is integrated along each angular sweep ( $\theta$ ) to produce a shoot  
827 biomass profile with defined regions belonging to the petioles and to the leaf blades. **(B)** For the  
828 carrot root mask, pixels are summed across each row to produce a root biomass profile.

## Automated image analysis for genetic studies of carrot shoot and root shape

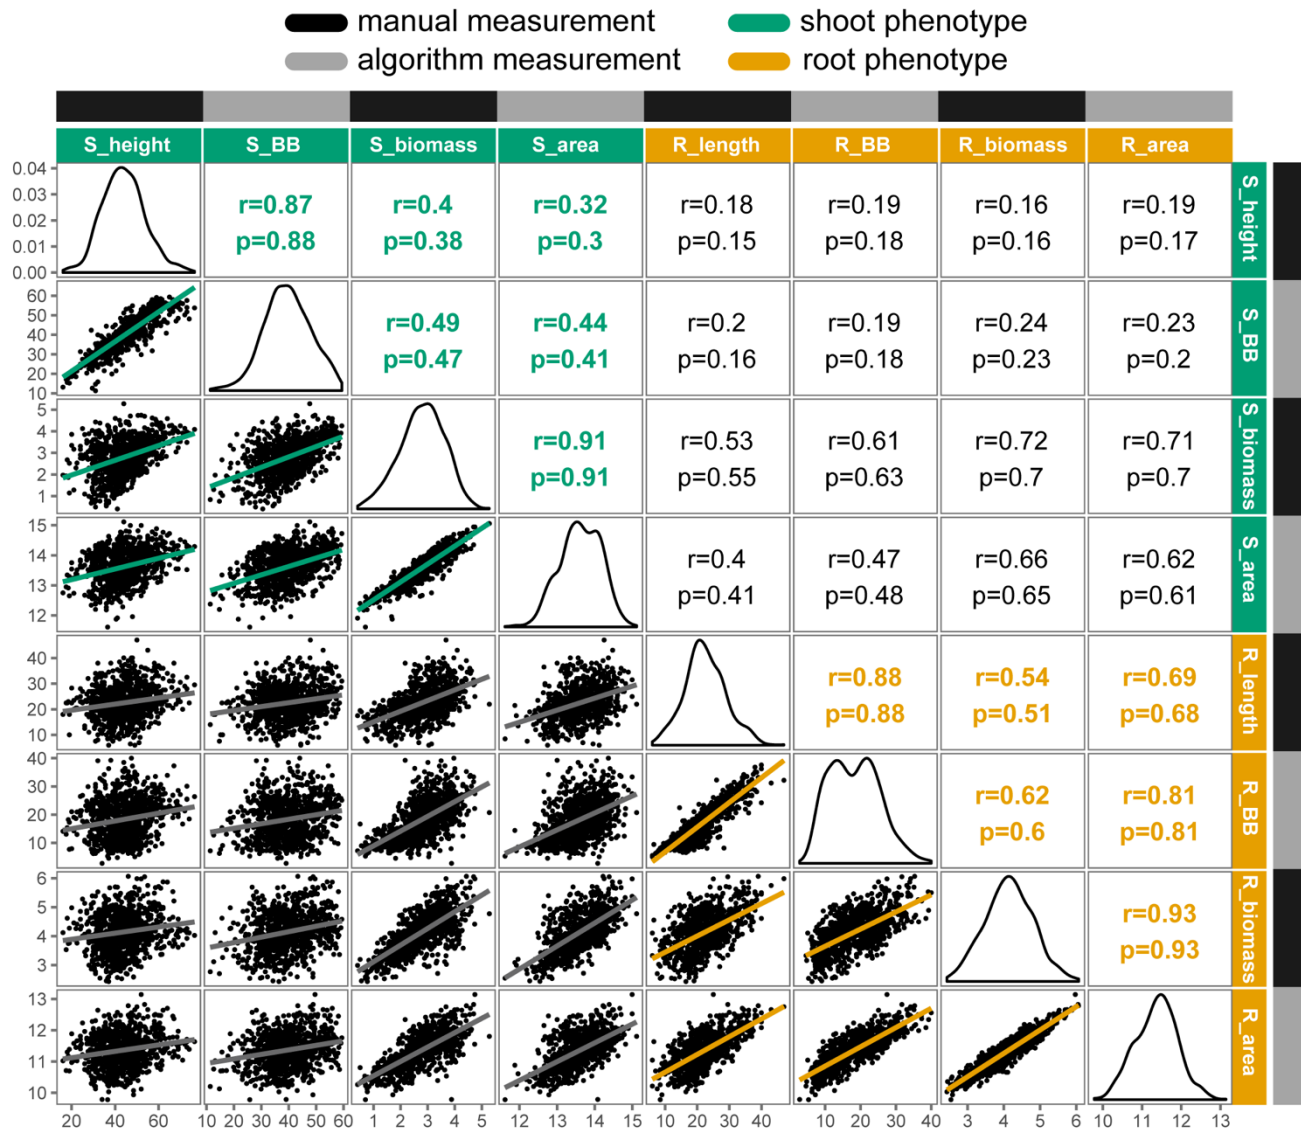

829

830 **Figure 3:** Correlation matrix of selected manual and algorithm measurements in carrot (n=917  
 831 individuals). Trait distributions are on the diagonal, with Pearson's correlation coefficients (r) and  
 832 Spearman's rho ( $\rho$ ) displayed on the upper triangle and linear relationships on the lower triangle. All  
 833 correlations were significant at  $P < 0.001$ . Trait key: S\_height = shoot height (cm); S\_BB = shoot  
 834 bounding box height (cm); S\_biomass = shoot biomass (g, fresh); S\_area = digital shoot biomass  
 835 (px); R\_length = root length (cm); R\_BB = root bounding box height (cm); R\_biomass = root  
 836 biomass (g, fresh); R\_area = digital root biomass (px). Note that biomass traits are natural log  
 837 transformed.



## Automated image analysis for genetic studies of carrot shoot and root shape

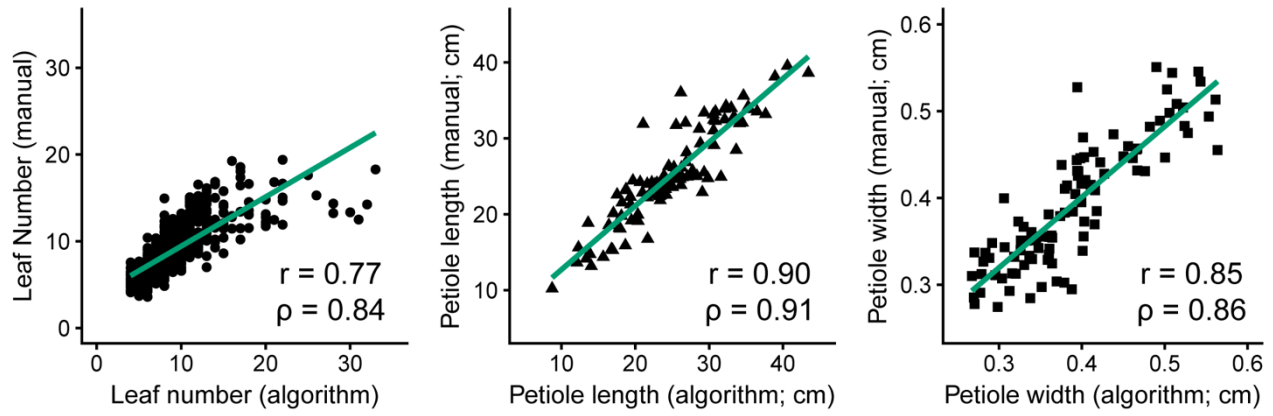

838

839 **Figure 4:** Comparison of manual measurements to algorithm-derived values for leaf number (left,  
840  $n=910$ ,  $R^2=0.59$ ,  $P \leq 0.001$ ), petiole length (middle,  $n=100$ ,  $R^2=0.81$ ,  $P \leq 0.001$ ), and petiole width  
841 (right,  $n=100$ ,  $R^2=0.72$ ,  $P \leq 0.001$ ).

## Automated image analysis for genetic studies of carrot shoot and root shape

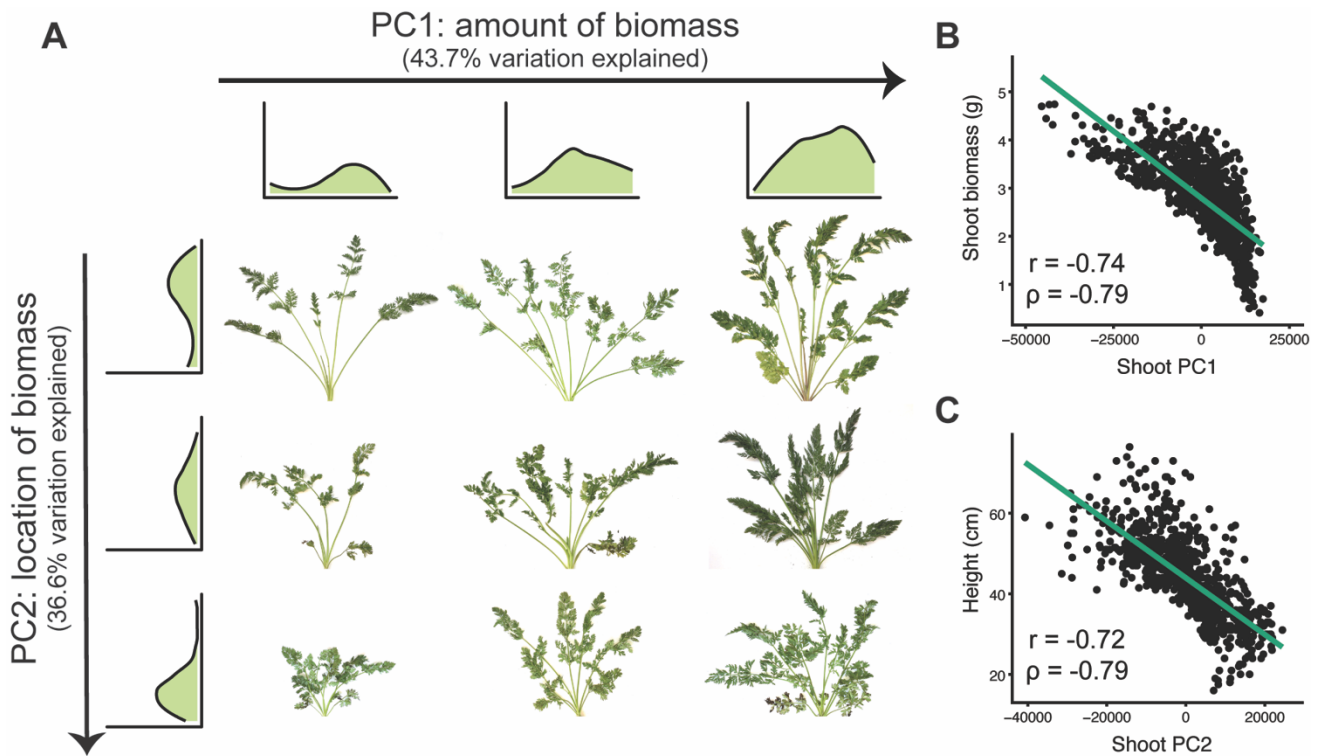

842

843 **Figure 5:** Principal components analysis for shoot biomass profiles ( $n = 917$  individuals). (A) The  
844 first two principal components (PC1 and PC2) detect variation for the magnitude and location of  
845 carrot shoot biomass, respectively. Shoot biomass profiles are shown for the top three and leftmost  
846 three images. From left to right, sweeping PC1 primarily reflected the amount of biomass (43.7%  
847 variation explained). From top to bottom, sweeping PC2 reflected where the biomass was distributed  
848 (i.e. petiole length) (36.6% variation explained). (B) Correlation of shoot PC1 with biomass  
849 ( $P \leq 0.001$ ). (C) Correlation of shoot PC2 with shoot height ( $P \leq 0.001$ ).

## Automated image analysis for genetic studies of carrot shoot and root shape

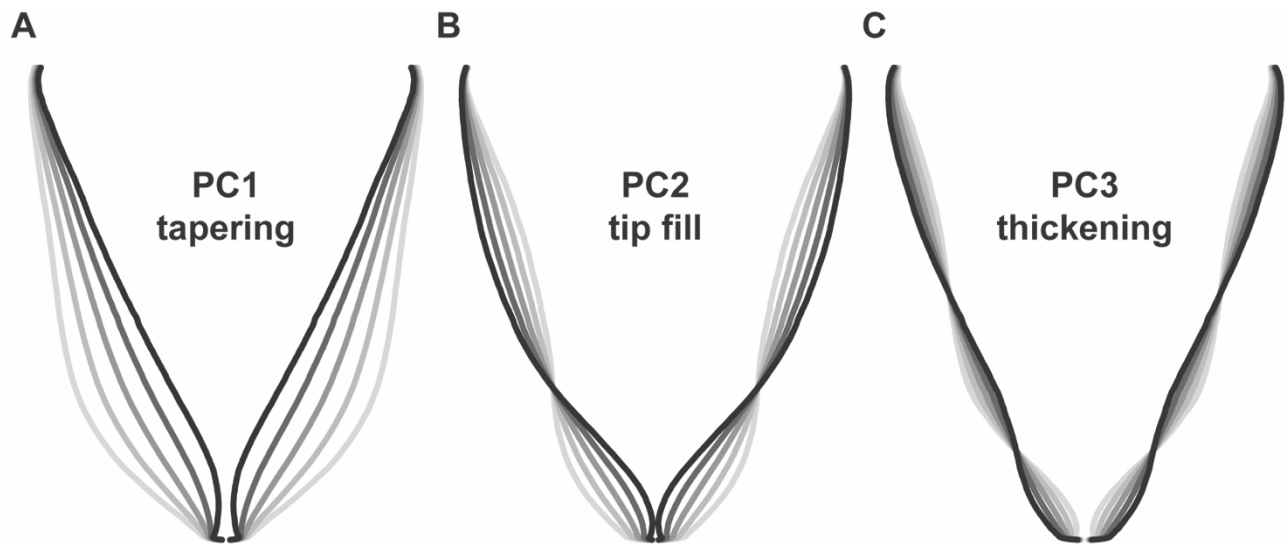

850

851 **Figure 6:** Eigenvectors for principal components analysis of carrot root shape after normalization for  
852 aspect ratio (n=917 individuals). Lines represent a parameter sweep of the principal component,  
853 capturing symmetrical variation in root shape. **(A)** Changes in PC1 modified the extent of root  
854 tapering (conical vs. cylindrical) and explained 66.4% of the observed variation. **(B)** Changes in PC2  
855 reflected the degree of tapering at the tip of the root (i.e. tip fill) and explained 16.6% of the observed  
856 variation. **(C)** Changes in PC3 captured variation for thickening in the longitudinal section of the root  
857 and explained 5.6% of the observed variation.

## Automated image analysis for genetic studies of carrot shoot and root shape

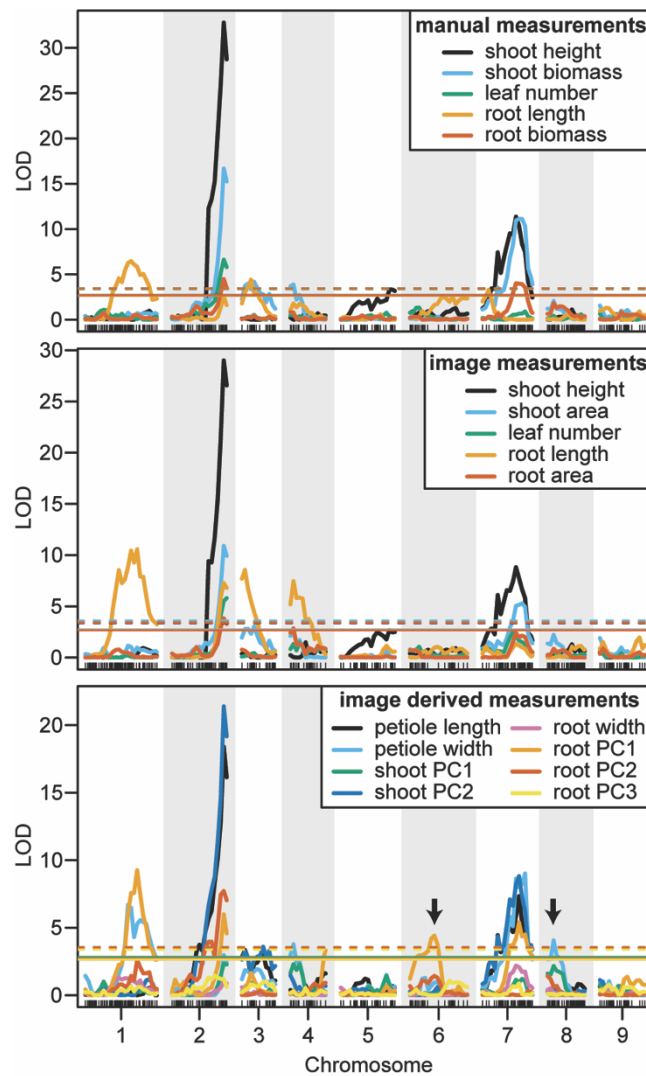

858

859 **Figure 7:** LOD curves for manually measured traits (top), image measured traits which were  
860 analogous to manual measurements (middle), and traits that were only measured from images  
861 (bottom). Arrows designate QTL that were identified by image measurements but not by manual  
862 measurements. Horizontal lines indicate the significant LOD thresholds for  $P < 0.05$  (solid) and  
863  $P < 0.01$  (dashed).

**Automated image analysis for genetic studies of carrot shoot and root shape**

864 **Table 1:** Estimates of repeatability, trait ranges, and corresponding pedigrees for shoot  
 865 characteristics in 42 inbreds and hybrids from a six-parent carrot diallel. Measurements include  
 866 values measured manually and from images. Values are mean  $\pm$  standard error.

867

|                        | Trait                          | Repeatability |        |         | Value                   | Genotype            |                   |
|------------------------|--------------------------------|---------------|--------|---------|-------------------------|---------------------|-------------------|
|                        |                                | WI2015        | CA2016 | Overall |                         |                     |                   |
| <b>Manual</b>          | shoot height (cm)              | 0.83          | 0.93   | 0.52    | min                     | 32.58 $\pm$ 0.85    | L6038B            |
|                        |                                |               |        |         | max                     | 71.5 $\pm$ 1.68     | Nbh2189A x B7262B |
|                        | shoot biomass (g; fresh)       | 0.81          | 0.78   | 0.45    | min                     | 13.38 $\pm$ 1.13    | L6038B            |
|                        |                                |               |        |         | max                     | 83.55 $\pm$ 32.15   | L7262A x Nbh2189B |
|                        | shoot biomass (g; dry)         | 0.88          | 0.71   | 0.51    | min                     | 1.26 $\pm$ 0.14     | L6038B            |
|                        |                                |               |        |         | max                     | 14.6 $\pm$ 3.62     | L7550A x P0159B   |
| leaf number            | 0.36                           | 0.53          | 0.31   | min     | 2.17 $\pm$ 0.17         | P0159B              |                   |
|                        |                                |               |        | max     | 26.75 $\pm$ 0.35        | P6139A              |                   |
| <b>Image</b>           | shoot bounding box height (cm) | 0.64          | 0.86   | 0.59    | min                     | 29.12 $\pm$ 0.94    | L6038B            |
|                        |                                |               |        |         | max                     | 54.24 $\pm$ 2.25    | Nbh2189A x P6139B |
|                        | shoot area (cm <sup>2</sup> )  | 0.03          | 0.83   | 0.19    | min                     | 252.87 $\pm$ 24.39  | L6038B            |
|                        |                                |               |        |         | max                     | 768.93 $\pm$ 106.65 | Nbh2189A x P0159B |
|                        | leaf number                    | 0.41          | 0.46   | 0.49    | min                     | 7.23 $\pm$ 0.4      | L6038A            |
|                        |                                |               |        |         | max                     | 16.04 $\pm$ 2.34    | 7262A x Nbh2189B  |
|                        | petiole width (cm)             | 0.35          | 0.84   | 0.24    | min                     | 0.32 $\pm$ 0.01     | Nbh2189A x L6038B |
|                        |                                |               |        |         | max                     | 0.49 $\pm$ 0.02     | Nbh2189A x B7262B |
|                        | petiole length (cm)            | 0.48          | 0.80   | 0.53    | min                     | 6.6 $\pm$ 4.7       | L6038A x P0159B   |
|                        |                                |               |        |         | max                     | 33.34 $\pm$ 1.12    | P6139A x Nbh2189B |
| shoot PC1 <sup>a</sup> | 0.73                           | 0.82          | 0.35   | min     | -26497.94 $\pm$ 9283.82 | P0159A              |                   |
|                        |                                |               |        | max     | 5639.89 $\pm$ 1880.02   | L6038A x P6139B     |                   |
| shoot PC2 <sup>a</sup> | 0                              | 0.84          | 0.31   | min     | -19350.49 $\pm$ 6184.13 | Nbh2189A x P0159B   |                   |
|                        |                                |               |        | max     | 15611.1 $\pm$ 1024.33   | P0159B              |                   |

<sup>a</sup> Measurements of principal components are relative to the full data used in this study and values are presented as raw component scores.

868

869

**Automated image analysis for genetic studies of carrot shoot and root shape**

870 **Table 2:** Estimates of repeatability, trait ranges, and corresponding pedigrees for root characteristics  
 871 in 42 inbreds and hybrids from a six-parent carrot diallel. Measurements include values measured  
 872 manually and from images. Values are mean  $\pm$  standard error.

873

|                    | Trait                         | Repeatability |        |         | Value                  | Genotype          |
|--------------------|-------------------------------|---------------|--------|---------|------------------------|-------------------|
|                    |                               | WI2015        | CA2016 | Overall |                        |                   |
| Manual             | root length                   | 0.42          | 0.39   | 0.01    | min 20.58 $\pm$ 1.25   | B7262B            |
|                    |                               |               |        |         | max 33.79 $\pm$ 1.43   | L7550A x L6038B   |
|                    | root biomass (g; fresh)       | 0.45          | 0.48   | 0.26    | min 25.37 $\pm$ 3.9    | B7262B            |
|                    |                               |               |        |         | max 266.51 $\pm$ 63.22 | L7550A x P0159B   |
|                    | root biomass (g; dry)         | 0.48          | 0.55   | 0.32    | min 3.23 $\pm$ 0.67    | B7262B            |
|                    |                               |               |        |         | max 34.54 $\pm$ 8.31   | L7550A x P0159B   |
| Image              | root bounding box height (cm) | 0.62          | 0.41   | 0.05    | min 10.1 $\pm$ 7.32    | B7262A x L7550B   |
|                    | root bounding box width (cm)  | 0.38          | 0.26   | 0.12    | min 3.29 $\pm$ 0.28    | P6139B            |
|                    |                               |               |        |         | max 8.97 $\pm$ 2.35    | P0159A x Nbh2189B |
|                    | root area (cm <sup>2</sup> )  | 0.55          | 0.33   | 0.2     | min 21.12 $\pm$ 3.10   | B7262B            |
|                    |                               |               |        |         | max 85.88 $\pm$ 16.06  | P0159A x Nbh2189B |
|                    | root PC1 <sup>a</sup>         | 0.21          | 0.36   | 0.21    | min -3.74 $\pm$ 0.66   | B7262B            |
|                    |                               |               |        |         | max 3.37 $\pm$ 6.58    | B7262A x L7550B   |
|                    | root PC2 <sup>a</sup>         | 0             | 0.1    | 0       | min -0.68 $\pm$ 0.32   | Nbh2189A x P6139B |
|                    |                               |               |        |         | max 2.32 $\pm$ 0.38    | B7262A x L7550B   |
|                    | root PC3 <sup>a</sup>         | 0             | 0.56   | 0.12    | min -1.03 $\pm$ 0.06   | P0159A x P0159B   |
| max 0.95 $\pm$ 0.2 |                               |               |        |         | L7550B                 |                   |

<sup>a</sup> Measurements of principal components are relative to the full data used in this study and values are presented as raw component scores.

874

875

**Automated image analysis for genetic studies of carrot shoot and root shape**

876 **Table 3:** Significant QTL ( $\alpha=0.05$ ), LOD values, percent variance explained (PVE), and 1.5 LOD  
 877 intervals for manual and image-based measurements of shoot traits in carrot.

878

|             | (Trait)<br>chromosome | QTL<br>name   | Closest<br>Marker | LOD value | PVE         | left marker | right marker | 1.5 LOD<br>Interval (Mb) |
|-------------|-----------------------|---------------|-------------------|-----------|-------------|-------------|--------------|--------------------------|
| Manual      | (height)              |               |                   |           |             |             |              |                          |
|             | 2                     | <i>ht-2.1</i> | S2_43085743       | 32.49     | 37.72       | S2_42846844 | S2_43581817  | 0.73                     |
|             | 5                     | <i>ht-5.1</i> | S5_41414532       | 3.33      | 4.73        | S5_6457993  | S5_41951182  | 35.49                    |
|             | 7                     | <i>ht-7.1</i> | S7_28224489       | 10.84     | 14.61       | S7_15056433 | S7_29551603  | 14.50                    |
|             | (shoot biomass)       |               |                   |           |             |             |              |                          |
|             | 2                     | <i>sb-2.1</i> | S2_43085743       | 16.42     | 21.28       | S2_42846844 | S2_43581949  | 0.74                     |
|             | 3                     | <i>sb-3.1</i> | S3_38999634       | 4.16      | 5.89        | S3_23294327 | S3_48725969  | 25.43                    |
|             | 4                     | <i>sb-4.1</i> | S4_5516472        | 3.88      | 5.49        | S4_2983852  | S4_17556866  | 14.57                    |
|             | 7                     | <i>sb-7.1</i> | S7_29473453       | 11.12     | 14.97       | S7_20379319 | S7_34717088  | 14.34                    |
|             | (leaf number)         |               |                   |           |             |             |              |                          |
| 2           | <i>ln-2.1</i>         | S2_43085743   | 6.57              | 9.13      | S2_42024242 | S2_43581949 | 1.56         |                          |
| image       | (height)              |               |                   |           |             |             |              |                          |
|             | 2                     | <i>ht-2.2</i> | S2_43085743       | 28.67     | 34.15       | S2_42846844 | S2_43581998  | 0.74                     |
|             | 7                     | <i>ht-7.2</i> | S7_20387007       | 8.43      | 11.56       | S7_11718785 | S7_31550284  | 19.83                    |
|             | (shoot area)          |               |                   |           |             |             |              |                          |
|             | 2                     | <i>sa-2.1</i> | S2_43085743       | 10.73     | 14.48       | S2_42846844 | S2_43581949  | 0.74                     |
|             | 3                     | <i>sa-3.1</i> | S3_38999634       | 3.02      | 4.30        | S3_23294327 | S3_48725969  | 25.43                    |
|             | 7                     | <i>sa-7.1</i> | S7_31972865       | 5.28      | 7.41        | S7_19018242 | S7_34717088  | 15.70                    |
|             | (leaf number)         |               |                   |           |             |             |              |                          |
|             | 2                     | <i>ln-2.2</i> | S2_43581949       | 5.81      | 8.12        | S2_42342776 | S2_43581949  | 1.24                     |
|             | (petiole width)       |               |                   |           |             |             |              |                          |
|             | 1                     | <i>pw-1.1</i> | S1_33448879       | 6.69      | 9.29        | S1_29083233 | S1_49929471  | 20.85                    |
|             | 2                     | <i>pw-2.1</i> | S2_43085743       | 2.90      | 4.13        | S2_42342776 | S2_43581949  | 1.24                     |
|             | 4                     | <i>pw-4.1</i> | S4_5516472        | 3.76      | 5.33        | S4_2983852  | S4_17556866  | 14.57                    |
|             | 7                     | <i>pw-7.1</i> | S7_33430504       | 8.94      | 12.22       | S7_20379319 | S7_34717088  | 14.34                    |
|             | 8                     | <i>pw-8.1</i> | S8_2442141        | 4.05      | 5.73        | S8_1370824  | S8_5678858   | 4.31                     |
|             | (petiole length)      |               |                   |           |             |             |              |                          |
|             | 2                     | <i>pl-2.1</i> | S2_43085743       | 18.16     | 23.26       | S2_42846844 | S2_43581949  | 0.74                     |
| 3           | <i>pl-3.1</i>         | S3_23294327   | 2.15              | 3.09      | S3_23294327 | S3_49446360 | 26.15        |                          |
| 7           | <i>pl-7.1</i>         | S7_28187058   | 7.25              | 10.02     | S7_20387007 | S7_31550284 | 11.16        |                          |
| (shoot PC2) |                       |               |                   |           |             |             |              |                          |
| 2           | <i>spc2-2.1</i>       | S2_43085743   | 21.10             | 26.47     | S2_42846844 | S2_43581949 | 0.74         |                          |
| 3           | <i>spc2-3.1</i>       | S3_48507169   | 3.27              | 4.66      | S3_23294327 | S3_50144206 | 26.85        |                          |

879

880

**Automated image analysis for genetic studies of carrot shoot and root shape**

881 **Table 4:** Significant QTL ( $\alpha=0.05$ ), LOD values, percent variance explained (PVE), and 1.5 LOD  
 882 intervals for manual and image-based measurements of root traits in carrot.

883

|              | (Trait)<br>chromosome | QTL<br>name     | Closest<br>Marker | LOD value | PVE         | left marker | right marker | 1.5 LOD<br>Interval (Mb) |
|--------------|-----------------------|-----------------|-------------------|-----------|-------------|-------------|--------------|--------------------------|
| <b>hand</b>  | (length)              |                 |                   |           |             |             |              |                          |
|              | 1                     | <i>rl-1.1</i>   | S1_38352734       | 6.47      | 9.00        | S1_25151874 | S1_49277871  | 24.13                    |
|              | 3                     | <i>rl-3.1</i>   | S3_37060244       | 4.39      | 6.20        | S3_23294327 | S3_43735481  | 20.44                    |
|              | 7                     | <i>rl-7.1</i>   | S7_833073         | 3.15      | 4.49        | S7_442640   | S7_3313327   | 2.87                     |
|              | (biomass)             |                 |                   |           |             |             |              |                          |
|              | 2                     | <i>rb-2.1</i>   | S2_43085743       | 4.42      | 6.24        | S2_42024242 | S2_43581949  | 1.56                     |
| 7            | <i>rb-7.1</i>         | S7_28224489     | 3.99              | 5.65      | S7_11718785 | S7_34717122 | 23.00        |                          |
| <b>image</b> | (length)              |                 |                   |           |             |             |              |                          |
|              | 1                     | <i>rl-1.2</i>   | S1_38352734       | 10.44     | 14.11       | S1_33448879 | S1_47240093  | 13.79                    |
|              | 2                     | <i>rl-2.1</i>   | S2_43085743       | 7.21      | 9.98        | S2_42024242 | S2_43581949  | 1.56                     |
|              | 3                     | <i>rl-3.2</i>   | S3_23294327       | 5.23      | 7.33        | S3_23294327 | S3_36496196  | 13.20                    |
|              | 4                     | <i>rl-4.1</i>   | S4_5516472        | 7.43      | 10.26       | S4_2983852  | S4_8969556   | 5.99                     |
|              | (area)                |                 |                   |           |             |             |              |                          |
|              | 2                     | <i>ra-2.1</i>   | S2_43085743       | 3.80      | 5.38        | S2_42024242 | S2_43581949  | 1.56                     |
|              | 4                     | <i>ra-4.1</i>   | S4_5516472        | 2.84      | 4.06        | S4_2983852  | S4_8969556   | 5.99                     |
|              | (PC2)                 |                 |                   |           |             |             |              |                          |
|              | 2                     | <i>rpc2-2.1</i> | S2_43085743       | 21.10     | 26.47       | S2_42846844 | S2_43581949  | 0.74                     |
|              | 3                     | <i>rpc2-3.1</i> | S3_48507169       | 3.27      | 4.66        | S3_23294327 | S3_50144206  | 26.85                    |
| 7            | <i>rpc2-7.1</i>       | S7_28187058     | 8.78              | 12.01     | S7_19018242 | S7_32082761 | 13.06        |                          |
| (PC3)        |                       |                 |                   |           |             |             |              |                          |
| 7            | <i>rpc3-7.1</i>       | S7_15056433     | 2.80              | 4.00      | S7_442640   | S7_35971570 | 35.53        |                          |

884
